# Supplementary material
Source: PubMed Central journal article supplement (PMC3966073)
Supplement: NIHMS546255-supplement-Additional_Supplemental_info.pdf [file NIHMS546255-supplement-Additional_Supplemental_info.pdf]

## **Supplementary Information: Detecting copy number variants using exome genotyping arrays in a large Swedish schizophrenia sample**

### Table of Contents

|                                                                                                                                               |           |
|-----------------------------------------------------------------------------------------------------------------------------------------------|-----------|
| <b>SUPPLEMENTAL METHODS</b>                                                                                                                   | <b>2</b>  |
| <b>OBTAINING CNV CALLS FROM THE ILLUMINA EXOME ARRAY</b>                                                                                      | <b>2</b>  |
| <b>THE SWEDISH SCHIZOPHRENIA STUDY</b>                                                                                                        | <b>3</b>  |
| SUBJECTS                                                                                                                                      | 3         |
| TABLE S1: THE SIX GENOTYPING BATCHES COMPRISING THE SWEDISH SAMPLE                                                                            | 3         |
| GENOMIC CHARACTERIZATION AND QUALITY CONTROL                                                                                                  | 4         |
| <b>CNV CALLING AND QUALITY CONTROL PROCEDURES</b>                                                                                             | <b>4</b>  |
| GWAS ARRAY CNV CALLING AND QC                                                                                                                 | 4         |
| EXOME ARRAY CNV CALLING AND QC                                                                                                                | 5         |
| CNV DATASETS FOR COMPARISON                                                                                                                   | 5         |
| TABLE S2. SUMMARY OF SUBJECT QUALITY CONTROL                                                                                                  | 6         |
| <b>METHOD FOR COMPARING CNV DATASETS</b>                                                                                                      | <b>6</b>  |
| FIGURE S1 STRATEGY FOR COMPARING TWO DATASETS                                                                                                 | 6         |
| <b>SUPPLEMENTAL RESULTS</b>                                                                                                                   | <b>7</b>  |
| TABLE S3. PROBE CONTENT COMPARISON GENOME-WIDE AND IN GENES                                                                                   | 7         |
| FIGURE S2. PROBE CONTENT COMPARISON GENOME-WIDE AND IN GENES                                                                                  | 7         |
| TABLE S4. PROBE CONTENT IN REGIONS OF INTERESTS                                                                                               | 9         |
| <b>EXAMPLES OF CNVs DETECTED BY THE EXOME ARRAY</b>                                                                                           | <b>12</b> |
| FIGURE S3. FIVE EXAMPLES OF LARGE CNVs DETECTED BY EXOME ARRAY                                                                                | 12        |
| <b>SUMMARY OF SIMULATION STUDY</b>                                                                                                            | <b>14</b> |
| TABLE S5. <i>IN SILICO</i> SEX-MIXING RESULTS FOR EXOME ARRAY                                                                                 | 14        |
| <b>SUMMARY OF CNVs FROM EXOME &amp; GWAS ARRAYS</b>                                                                                           | <b>15</b> |
| TABLE S6. COMPARISON OF CNV DATASETS USED IN FIGURE 1                                                                                         | 15        |
| FIGURE S4. COMPARISON OF CNV DATASETS USED IN FIGURE 1                                                                                        | 15        |
| FIGURE S5. CNV DATASET COMPARISON BY GENOTYPING BATCH, ARRAY TYPE, AND CNV CALLING ALGORITHM                                                  | 16        |
| <b>SUMMARY RESULTS OF COMPARING EXOME ARRAY CNVs TO GWAS ARRAY CNVs STRATIFIED BY ARRAY TYPE AND BY CNV CALLING ALGORITHM.</b>                | <b>17</b> |
| TABLE S7. SUMMARY RESULTS OF COMPARING FOR GENIC CNVs $\geq 400$ KB                                                                           | 17        |
| FIGURE S6: COMPARING SUBSETS OF CNV CALLS: SW2,3,4; ILLUMINA EXOME ARRAYS USING PENNCNV VERSUS GWAS AFFYMETRIX 6.0 ARRAYS USING BIRDSEYE      | 18        |
| FIGURE S7: COMPARING SUBSETS OF CNV CALLS: SW2,3,4; ILLUMINA EXOME ARRAYS USING PENNCNV VERSUS GWAS AFFYMETRIX 6.0 ARRAYS USING PENNCNV       | 19        |
| FIGURE S8: COMPARING SUBSETS OF CNV CALLS: SW5,6; ILLUMINA EXOME ARRAYS USING PENNCNV VERSUS GWAS ILLUMINA OMNI EXPRESS ARRAYS USING BIRDSEYE | 20        |
| FIGURE S9: COMPARING SUBSETS OF CNV CALLS: SW5,6; ILLUMINA EXOME ARRAYS USING PENNCNV VERSUS GWAS ILLUMINA OMNI EXPRESS ARRAYS USING PENNCNV  | 21        |
| FIGURE S10: COMPARING DISTRIBUTIONS OF LRR_SD BY GWAS GENOTYPING BATCHES AND ARRAY TYPE.                                                      | 22        |
| <b>SUMMARY OF ASSOCIATION SCAN</b>                                                                                                            | <b>23</b> |
| TABLE S8 PLINK OUTPUT OF CNV EVENTS AT A NOMINAL NOVEL LOCUS                                                                                  | 23        |
| FIGURE S11: PROBE INTENSITIES FROM EXOME AND GWAS ARRAYS AT CHR11Q12.2                                                                        | 24        |
| FIGURE S12: PROBE INTENSITIES FROM EXOME ARRAYS AT CHR11Q12.2                                                                                 | 25        |
| <b>REFERENCES</b>                                                                                                                             | <b>26</b> |

## Supplemental Methods

### **Obtaining CNV calls from the Illumina exome array**

1. Obtain signal intensity values (Log R Ratio and B Allele Frequency) using Illumina's GenomeStudio v2010.3 with the calling algorithm/genotyping module version 1.8.4. A custom cluster file could be created using the GenCall algorithm based on all samples.
2. Obtain and install PennCNV ([http://www.openbioinformatics.org/penncnv/penncnv\\_download.html](http://www.openbioinformatics.org/penncnv/penncnv_download.html))
3. Prepare PennCNV signal intensity files from Illumina Report file (Step 1) using "split\_illumina\_report.pl" script. ([http://www.openbioinformatics.org/penncnv/penncnv\\_input.html](http://www.openbioinformatics.org/penncnv/penncnv_input.html))
4. Prepare the GC-model file required by PennCNV:
  - a. Download the GC-content file whose build is the same as the signal intensity files (<http://hgdownload.cse.ucsc.edu/goldenPath/hg19/database/gc5Base.txt.gz>)
  - b. Unzip the file and use the linux command "sort -k 2,2 -k 3,3n" to sort by chromosome and position
  - c. Run the PennCNV "cal\_gc\_snp.pl" script to compute the GC model file
5. Prepare PennCNV population frequency of B-allele (PFB) file using EITHER (a) or (b):
  - a. Select a large number of representative samples (e.g. 300) and use their intensity files and the "compile\_pfb.pl" script in PennCNV to compute the PFB file.
  - b. Obtain genotypes of a large number of representative samples using GenomeStudio v2010.3 with the calling algorithm/genotyping module version 1.8.4 with subsequent processing of genotype calling done by the zCall algorithm. Compute the PFB from these genotype calls.
  - c. From (a) or (b) above, SNPs with PFB=0 are treated as intensity-only markers by changing to PFB=2.
6. Prepare the HMM model file specialized for the Illumina exome array.
  - a. The HMM model file used in this study is provided at the end of this instruction. Additional assistance can be obtained from [jin\\_szatkiewicz@med.unc.edu](mailto:jin_szatkiewicz@med.unc.edu).
  - b. More generally, modify the emission parameters in the default HMM model file "hall.hmm" provided by PennCNV. The initial emission parameters can be estimated empirically from high-confidence large CNVs, through the BeadStudio Genome Viewer for a set of genotyped individuals and simple linear interpolation. Optimization can be carried out by testing a series of parameter values using a large set of training samples.
7. Obtain CNV calls
  - a. Use the PennCNV "detect\_cnv.pl" script and with the customized parameter files constructed in Steps 4 through 6 to generate CNV calls for each sample.
  - b. Make sure the -conf (to produce confidence score of the CNV calls) and the -log (to document intensity-based sample quality metrics in a log file) options are specified with "detect\_cnv.pl".
8. Apply customized quality control to the CNV calls
  - a. For example, remove CNV calls with confidence score < 10, or spanning < 10 probes.
  - b. Anneal any CNVs that appeared to be artificially split by the PennCNV HMM model using the "combineseg" option of the "clean\_cnv.pl" script from PennCNV
9. Apply subject quality control based on CNV metrics
  - a. Use the "filter\_cnv.pl" script to obtain a summary file from the log file produced in step 7 that contains intensity-based quality control metrics for each sample.
  - b. Remove low quality samples with extreme values (e.g., >95<sup>th</sup> percentile) for LRR\_standard deviation or BAF\_drift, or were outliers with respect to the total number or total base pairs of CNV calls.

**HMM model file used in this study:**

```

M=6
N=6
A:
0.936719716 0.006332139 0.048770575 0.000000001 0.008177573 0.000000001
0.000001036 0.949230924 0.048770575 0.000000001 0.001168245 0.000029225
0.000004595 0.000047431 0.999912387 0.000000001 0.000034971 0.000000621
0.000049998 0.000049998 0.000049998 0.999750015 0.000049998 0.000049998
0.000916738 0.001359036 0.048770575 0.000000001 0.948953653 0.000000002
0.000000001 0.000000001 0.027257213 0.000000001 0.000000004 0.972742785
B:
0.950000 0.000001 0.050000 0.000001 0.000001 0.000001
0.000001 0.950000 0.050000 0.000001 0.000001 0.000001
0.000001 0.000001 0.999995 0.000001 0.000001 0.000001
0.000001 0.000001 0.050000 0.950000 0.000001 0.000001
0.000001 0.000001 0.050000 0.000001 0.950000 0.000001
0.000001 0.000001 0.050000 0.000001 0.000001 0.950000
pi:
0.000001 0.000500 0.999000 0.000001 0.000500 0.000001
B1_mean:
-2.051407 -0.5 0.000000 100.000000 0.32 0.62
B1_sd:
1.329152 0.17 0.159645 0.211396 0.25 0.30
B1_uf:
0.010000
B2_mean:
0.000000 0.250000 0.333333 0.500000 0.500000
B2_sd:
0.016372 0.042099 0.045126 0.034982 0.304243
B2_uf:
0.010000
B3_mean:
-2.051407 -0.572210 0.000000 0.000000 0.361669 0.626711
B3_sd:
2.132843 0.382025 0.184001 0.200297 0.253551 0.353183
B3_uf:
0.010000

```

***The Swedish Schizophrenia Study*****Subjects**

All procedures were approved by ethical committees in Sweden and in the US, and all subjects provided written informed consent (or legal guardian consent and subject assent). Data collection for this study took six years (2005-2011). As shown in Table S1, GWAS genotyping was conducted in six separate batches (denoted Sw1-Sw6) using three GWAS arrays (Affymetrix 5.0, Affymetrix 6.0, and Illumina Omni Express). Genotypes were generated as sufficient numbers of samples accumulated from the field work in Sweden. Of the total sample of 11,850 Swedish subjects before QC (5,351 cases with schizophrenia, 6,509 controls), 57.4% (Sw5 and Sw6) have never been reported previously.

**Table S1: The six genotyping batches comprising the Swedish sample**

| Feature           | Sw1   | Sw2   | Sw3   | Sw4   | Sw5   | Sw6   |
|-------------------|-------|-------|-------|-------|-------|-------|
| GWAS arrays       | affy5 | affy6 | affy6 | affy6 | ioexp | ioexp |
| Subjects (pre-QC) | 464   | 694   | 1,498 | 2,388 | 4,461 | 2,345 |

*Affy5: Affymetrix 5.0; Affy6: Affymetrix 6.0; ioexp: Illumina Omni Express.*

**Cases** with schizophrenia were identified via the Swedish Hospital Discharge Register (1, 2) which captures all public and private inpatient hospitalizations. The register is complete from 1987 and augmented by psychiatric data from 1973-86. The register contains ICD discharge diagnoses (3-5) made by attending physicians for each hospitalization. (6-9) Case inclusion criteria:  $\geq 2$  hospitalizations with a discharge diagnosis of schizophrenia, both parents born in Sweden, and age  $\geq 18$  years. Case exclusion criteria: hospital register diagnosis of any medical

or psychiatric disorder mitigating a confident diagnosis of schizophrenia as determined by expert review, and included removal of 3.4% of eligible cases due to the primacy of another psychiatric disorder (0.9%) or a general medical condition (0.3%) or uncertainties in the Hospital Discharge Register (e.g., contiguous admissions with brief total duration, 2.2%). The validity of this case definition of schizophrenia is strongly supported.

Controls were selected at random from Swedish population registers. Our goal was to obtain an appropriate control group and to avoid “super-normal” controls. (10) Control inclusion criteria: never hospitalized for schizophrenia or bipolar disorder (given evidence of genetic overlap with schizophrenia), (11-13) both parents born in Sweden, and age  $\geq 18$  years.

### Genomic characterization and quality control

All genomic locations are given in NCBI build 37/UCSC hg19 coordinates. DNA was extracted from peripheral blood samples using Qiagen technologies at the Karolinska Institutet Biobank.

GWAS array genotyping. As shown in **Table S1**, samples were genotyped in six batches at the Broad Institute using Affymetrix 5.0 (3.9%), Affymetrix 6.0 (38.6%), and Illumina OmniExpress (57.4%) arrays according to the manufacturers' protocols. Genotype calling and quality control was done in four sets corresponding to data from Affymetrix 5.0 (Sw1), Affymetrix 6.0 (Sw2-4), and the OmniExpress batches (Sw5, Sw6). Genotypes were called using Birdsuite (Affymetrix) or BeadStudio (Illumina).

A multi-step quality control (QC) procedure was carried out. The exclusionary measures of basic quality control were: SNP missingness  $\geq 0.05$  (before sample removal); subject missingness  $\geq 0.02$ ; autosomal heterozygosity deviation; SNP missingness  $\geq 0.02$  (after sample removal); difference in SNP missingness between cases and controls  $\geq 0.02$ ; and deviation from Hardy-Weinberg equilibrium ( $P < 10^{-6}$  in controls or  $P < 10^{-10}$  in cases). After basic quality control, 77,986 autosomal SNPs directly genotyped on all three GWAS platforms were extracted and pruned to remove SNPs in LD ( $r^2 > 0.05$ ) or with minor allele frequency  $< 0.05$ , leaving 39,239 SNPs suitable for robust relatedness testing. Relatedness testing was done with PLINK (16) and pairs of subjects with  $\pi > 0.2$  were identified and one member of each relative pair removed at random.

Following quality control, a total of 11,224 subjects (5,001 cases with SCZ and 6,243 controls) remained and were used for subsequent CNV calling and analysis.

Exome array genotyping. DNA samples were sent to the Broad Institute Genetic Analysis Platform (GAP) for genotyping, are placed on 96-well plates for processing using the Illumina Infinium HumanExome BeadChip v1.0. Majority of Exome genotypes were called using GenomeStudio v2010.3 with the calling algorithm/genotyping module version 1.8.4 using the custom cluster file StanCtrExChp\_CEPH.egt, subsequent processing of genotype calling was done by zCall(14). The Broad Institute did not filter any SNPs based off of technical quality control metrics. Only samples passing an overall call rate of 98% criteria and standard identity check were released from GAP. Then the 11,224 subjects that passed SNP-based QC filters as described in the previous section “GWAS array genotyping” were extracted for subsequent CNV calling and analysis.

## CNV calling and quality control procedures

### GWAS array CNV calling and QC

We applied two methods, the Birdseye tool in Birdsuite(17) and the PennCNV software (June 2011 version) (15) to autosomal intensity data from both SNP and CNV probes. All genomic locations are given in NCBI build 37/UCSC hg19 coordinates. Birdseye applies Hidden Markov Model (HMM) to the normalized probe intensities for each allele, using model priors (i.e. allele

specific probe responses) generated separately for each type of GWAS arrays. PennCNV applies a HMM to the log R ratios (LRR) and B allele frequencies (BAF). For Illumina arrays, LRR and BAF were produced by Illumina's GenomeStudio (v2010.3). For Affymetrix arrays, we used the PennCNV procedure ([http://www.openbioinformatics.org/penncnv/penncnv\\_tutorial\\_affy\\_gw6.html](http://www.openbioinformatics.org/penncnv/penncnv_tutorial_affy_gw6.html)) to prepare LRR and BAF from Affymetrix .CEL files. For CNV calling, we used PennCNV's default program parameters recommended for each array type (affygw5.hmm, affgw6.hmm, hhall.hmm for Affy5.0, Affy6.0, and Illumina OmniExpress respectively). In addition, the default genomic wave adjustment routine in detect\_cnv.pl program were used in generating CNV calls using default model files (affygw5.gcmode1, affygw6.gcmode1, hhall.gcmode1).

For each initial callset (one from Birdseye and the other from PennCNV), a multi-step quality control procedure was applied. First, CNVs were excluded if they were of low confidence CNV (LOD <10, size < 20kb, or spanning < 10 probes). Any CNVs that appeared to be artificially split by the HMM were annealed using an in-house perl script, which recursively joins CNVs as long as the called region is greater or equal to 80% of the entire region to be joined. CNVs were also excluded if they had any overlap with large genomic gaps (downloaded from the UCSC table browser). Next, additional subject quality control was carried out using CNV metrics (**Table S2**). Specifically, subjects were excluded if they had > 40 CNV calls or > 10Mb of CNVs using Birdseye algorithm. (18) Finally, we imposed a 1% frequency threshold, by removing any CNV with greater than 50% of its length spanning a region with CNVs from >1% of total post-QC subjects as implemented in PLINK. (16)

#### Exome array CNV calling and QC

CNV calling began with raw intensity data processing. A custom cluster file was created using the GenCall algorithm based on all samples. Normalized intensity values were obtained using Illumina's GenomeStudio (v2010.3) with the calling algorithm/genotyping module (v1.8.4). PennCNV (June 2011 version) (15) was applied to the log R ratios (LRR) and B allele frequencies (BAF) calculated from the normalized intensity values. PennCNV implements a hidden Markov model (HMM) that incorporates multiple sources of information, including LRR and BAF at each SNP marker, the distance between neighboring SNPs, and SNP allele frequencies. See section "Obtaining CNV calls from the Illumina exome array" for details.

A multi-step quality control procedure was applied to the initial CNVs. First, CNVs were excluded if they were of low-confidence (confidence score < 10, or spanning <10 probes, or confidence:probe ratio < 0.5, or span > 20kb per supporting probe on average). Any CNVs that appeared to be artificially split by the HMM were annealed using the "combineseg" option of the "clean\_cnv.pl" script from PennCNV software. CNVs were also excluded if they had any overlap with genomic gaps (downloaded from the UCSC table browser). Next, additional subject quality control was carried out using CNV metrics (**Table S2**). Specifically, subjects were excluded if they had extreme values for LRR\_standard deviation (> 0.2, 95<sup>th</sup> percentile) or BAF\_drift (> 0.01, 95<sup>th</sup> percentile), or were outliers with respect to the total number of CNV calls (>152, 95<sup>th</sup> percentile). Finally, we imposed a 1% frequency threshold by removing any CNV with > 50% of its length spanning a region with CNVs from >1% of total post-QC subjects as implemented in PLINK. (16) All large CNVs were visually inspected using a custom R script to generate intensity values of the probes involved in CNVs and in the flanking regions (e.g., **Figure S3**).

#### CNV datasets for comparison

As summarized in **Table S2**, for combined analysis, we identified 9,100 subjects (3,962 cases with SCZ and 5,138 controls) passing all quality control procedures. For analysis stratified by GWAS array type, we created CNV subsets for 307 (3.4%) subjects that were genotyped using Affymetrix 5.0; for 3,030 (33.3%) subjects that were genotyped using Affymetrix 6.0; and for 5,736 (63.3%) subjects that were genotyped using Illumina Omni Express.

**Table S2. Summary of Subject Quality Control**

| Genotyping batch                                                                                                    | Sw1               | Sw2,3,4           | Sw5,6                   | Total  |
|---------------------------------------------------------------------------------------------------------------------|-------------------|-------------------|-------------------------|--------|
| By GWAS Array types                                                                                                 | Affymetrix<br>5.0 | Affymetrix<br>6.0 | Illumina<br>OmniExpress |        |
| Total subjects genotyped                                                                                            | 464               | 4,580             | 6,806                   | 11,850 |
| Subjects passing QC I based on GWAS SNP metrics <sup>1</sup>                                                        | 427               | 4,261             | 6,556                   | 11,244 |
| Subjects passing QC II based on CNV metrics for both exome and GWAS arrays ( <b>Analysis dataset</b> ) <sup>2</sup> | 307<br>(3.4%)     | 3,030<br>(33.3%)  | 5,763<br>(63.3%)        | 9,100  |

1. Only subjects that passed GWAS QC based on SNP metrics were considered for CNV analysis.

2. Additional subject QC based on CNV metrics was conducted separately for exome array and for GWAS arrays. Finally, subjects that passed all QC steps were identified, comprising the final subjects for combined and stratified comparisons.

### Method for comparing CNV datasets

As illustrated in **Figure 1**, we carried out comparisons with and without restriction on probe overlap between two experimental platforms of interests. In **Figure S1**, A is defined as all CNVs from dataset A. A' is defined as a subset of eligible calls comprised of any CNV that have  $\geq 3$  probes on platform B and on average every such B probes supports  $<20\text{kb}$  of the CNV. The numerators are any CNV in A or A' detected by dataset B. A CNV in A is detected when  $\geq 50\%$  of its length is overlapped by a CNV in B. The perl scripts accompanying the XHMM package (<http://atgu.mgh.harvard.edu/xhmm/>) and custom R scripts were used to calculate overlap between two CNV datasets.

**Figure S1 strategy for comparing two datasets**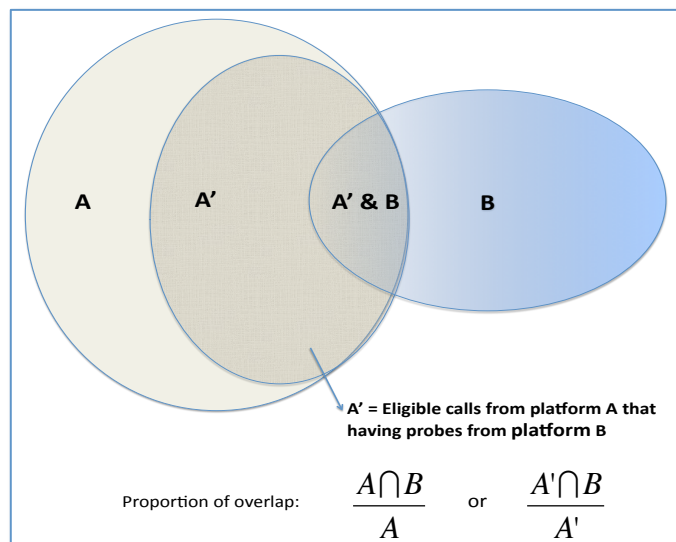

## Supplemental Results

**Table S3. Probe content comparison genome-wide and in genes**

| Platform          | Genome    |                      | Gene <sup>1</sup>    |                      |                    | Gene (%) no probe coverage |                                |
|-------------------|-----------|----------------------|----------------------|----------------------|--------------------|----------------------------|--------------------------------|
|                   | Probes    | Density <sup>2</sup> | #Probes (% in genes) | Density <sup>2</sup> | Median #probe/gene |                            | Range <sup>3</sup> #probe/gene |
| ILMN Exome array  | 247,870   | 1.6                  | 238,754 (96%)        | 3.9                  | 9                  | 1-849                      | 4,858 (21%)                    |
| AFFY SNP 5.0      | 440,638   | 2.8                  | 181,457 (41%)        | 2.9                  | 5                  | 1-842                      | 8,645 (37%)                    |
| AFFY SNP 6.0      | 1,877,941 | 12.1                 | 772,449 (41%)        | 12.5                 | 14                 | 1-3043                     | 4,394 (19%)                    |
| ILMN Omni Express | 728,816   | 4.7                  | 323,731 (44%)        | 5.2                  | 7                  | 1-1624                     | 4,126 (18%)                    |

1. The gene model is the maximal transcripts for RefSeq mRNA genes resulting in a total of 23,101 genes. 2. Density given as probes/20kb. 3. Range: minimum #probes/gene to maximum #probes/gene

**Figure S2. Probe content comparison genome-wide and in genes**

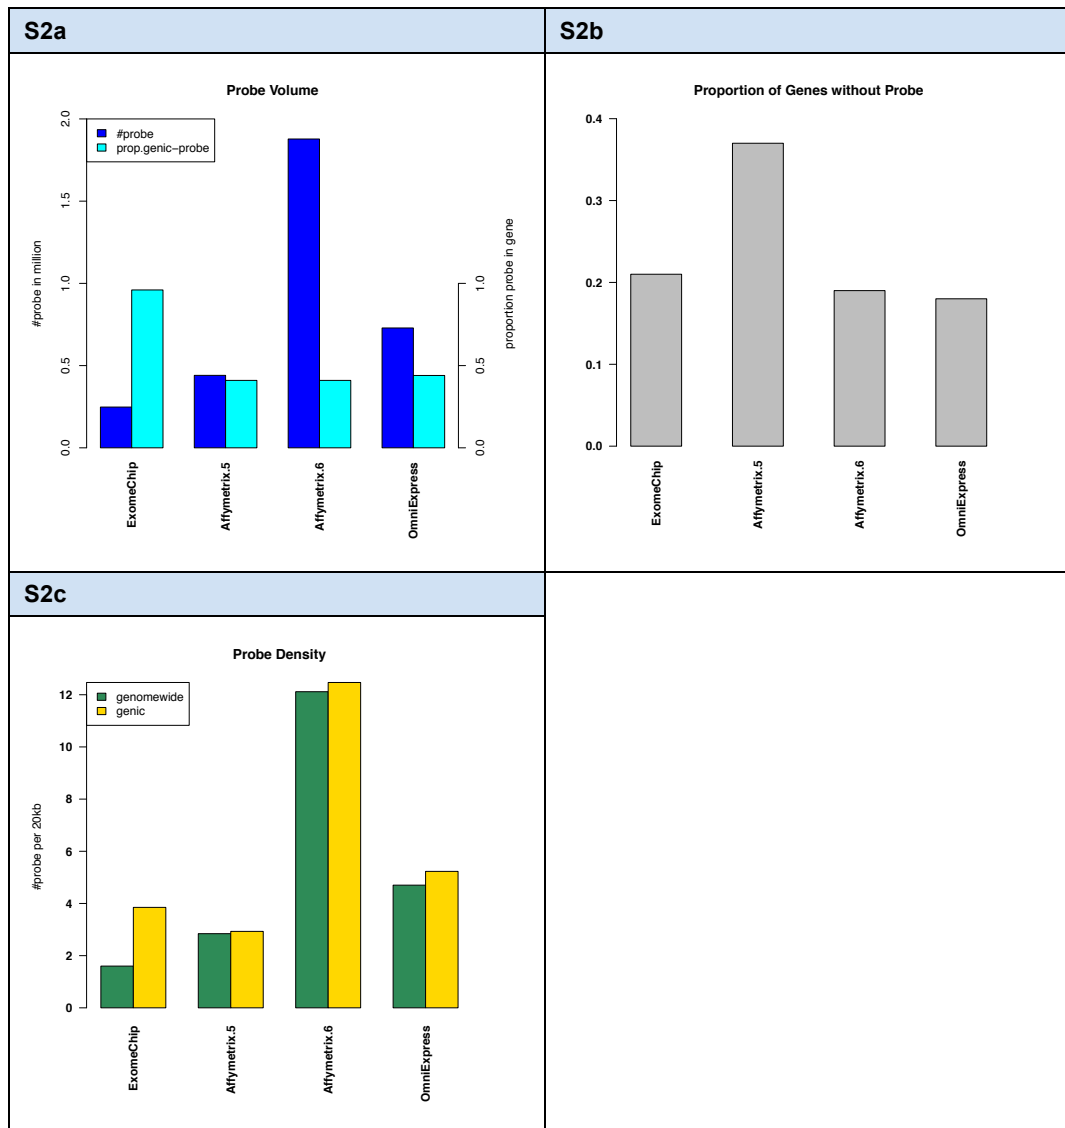

We defined a “probe” as any microarray SNP or copy number probe. A genic probe is any probe that overlaps a gene by at least 1bp.

As shown in **Table S3 and Figures S2**, the exome array has 96% of all probes in genes, and covers 79% of all genes, which is similar to the genic coverage of high-density GWAS chips (81% for Affymetrix 6.0 and 82% for Illumina Omni Express). Within genes, the exome array has a higher mean probe density (3.85 probes/20 kb) than Affymetrix 5.0 (2.93 probes per 20kb) but lower than high-density GWAS chips (12.47 probes/20kb for Affymetrix 6.0 and 5.23 probes/20kb for Illumina Express).

The genomic distribution of exome array probes is non-uniform. The genomic distance between consecutive probes ranges from 0bp to 22Mb genome-wide and from 0bp to 447kb within genes, with a median inter-probe distance of 171bp.

In terms of allele frequencies, 44% of SNPs on the exome array are not polymorphic and 40% have minor allele frequency < 0.01, based on genotypes generated by zCall (14) from 18,056 chromosomes.

These results suggest that exome array has sufficient genic-probes to interrogate gene-centric CNV although probe features that are specific to the exome array must be taken into account by the computational methods used for detecting CNV.



Table S4. Probe content in regions of interests

| Source   | Chr   | Start     | End       | #exome.chip.probes | #probes/kb |
|----------|-------|-----------|-----------|--------------------|------------|
| asd      | chr1  | 10002     | 5408761   | 1023               | 5.28       |
| asd      | chr1  | 146512377 | 147737376 | 107                | 11.45      |
| asd      | chr10 | 4710002   | 10559994  | 402                | 14.55      |
| asd      | chr10 | 81692665  | 88942014  | 338                | 21.45      |
| asd      | chr10 | 128010011 | 135524747 | 585                | 12.85      |
| asd      | chr11 | 2013425   | 2913424   | 156                | 5.77       |
| asd      | chr11 | 31803510  | 32510988  | 13                 | 54.42      |
| asd      | chr11 | 43985278  | 46064560  | 196                | 10.61      |
| asd      | chr11 | 115894792 | 134946516 | 2318               | 8.22       |
| asd      | chr15 | 22876633  | 28557186  | 297                | 19.13      |
| asd      | chr15 | 30769996  | 32701482  | 115                | 16.8       |
| asd      | chr15 | 74377175  | 76162277  | 439                | 4.07       |
| asd      | chr15 | 99357971  | 102521392 | 444                | 7.12       |
| asd      | chr16 | 3781465   | 3861246   | 19                 | 4.2        |
| asd      | chr16 | 15504455  | 16284248  | 148                | 5.27       |
| asd      | chr16 | 21613957  | 29042192  | 800                | 9.29       |
| asd      | chr17 | 2         | 2545429   | 481                | 5.29       |
| asd      | chr17 | 16706022  | 20482061  | 563                | 6.71       |
| asd      | chr17 | 29162823  | 30218667  | 114                | 9.26       |
| asd      | chr17 | 34907367  | 36076803  | 137                | 8.54       |
| asd      | chr17 | 43632467  | 44210205  | 97                 | 5.96       |
| asd      | chr2  | 57741797  | 61738334  | 171                | 23.37      |
| asd      | chr2  | 149216039 | 149271044 | 18                 | 3.06       |
| asd      | chr2  | 196925090 | 205206940 | 660                | 12.55      |
| asd      | chr2  | 239954694 | 243102476 | 552                | 5.7        |
| asd      | chr22 | 18546350  | 22336469  | 623                | 6.08       |
| asd      | chr22 | 51045517  | 51187844  | 29                 | 4.91       |
| asd      | chr3  | 195672230 | 197497869 | 282                | 6.47       |
| asd      | chr4  | 10002     | 2073670   | 502                | 4.11       |
| asd      | chr4  | 82009852  | 82963464  | 24                 | 39.73      |
| asd      | chr5  | 10001     | 11723854  | 749                | 15.64      |
| asd      | chr5  | 88016167  | 88179024  | 1                  | -          |
| asd      | chr5  | 175130403 | 177456545 | 447                | 5.2        |
| asd      | chr7  | 72332744  | 74616901  | 229                | 9.97       |
| asd      | chr8  | 8119296   | 11765719  | 452                | 8.07       |
| asd      | chr9  | 140403364 | 141153431 | 107                | 7.01       |
| asd      | chrX  | 152749901 | 153390999 | 166                | 3.86       |
| decipher | chr1  | 10002     | 5408761   | 1023               | 5.28       |
| decipher | chr1  | 145401254 | 145928123 | 161                | 3.27       |
| decipher | chr1  | 146512931 | 147737500 | 107                | 11.44      |
| decipher | chr11 | 31803510  | 32510988  | 13                 | 54.42      |
| decipher | chr11 | 43985278  | 46064560  | 196                | 10.61      |
| decipher | chr12 | 65071920  | 68645525  | 179                | 19.96      |
| decipher | chr15 | 22876633  | 28557186  | 297                | 19.13      |
| decipher | chr15 | 30769996  | 32701482  | 115                | 16.8       |
| decipher | chr15 | 74377175  | 76162277  | 439                | 4.07       |
| decipher | chr15 | 99357971  | 102521392 | 444                | 7.12       |
| decipher | chr16 | 60002     | 834372    | 554                | 1.4        |
| decipher | chr16 | 3781465   | 3861246   | 19                 | 4.2        |
| decipher | chr16 | 15504455  | 16284248  | 148                | 5.27       |
| decipher | chr16 | 21613957  | 29042192  | 800                | 9.29       |
| decipher | chr16 | 29501199  | 30202572  | 166                | 4.23       |
| decipher | chr17 | 2         | 2545429   | 481                | 5.29       |
| decipher | chr17 | 13968608  | 15434038  | 58                 | 25.27      |
| decipher | chr17 | 16706022  | 20482061  | 563                | 6.71       |
| decipher | chr17 | 29162823  | 30218667  | 114                | 9.26       |
| decipher | chr17 | 34907367  | 36076803  | 137                | 8.54       |
| decipher | chr17 | 43632467  | 44210205  | 97                 | 5.96       |
| decipher | chr2  | 57741797  | 61738334  | 171                | 23.37      |
| decipher | chr2  | 196925090 | 205206940 | 660                | 12.55      |
| decipher | chr2  | 239954694 | 243102476 | 552                | 5.7        |
| decipher | chr21 | 27037957  | 27548479  | 35                 | 14.59      |
| decipher | chr22 | 2         | 16971860  | 0                  | -          |
| decipher | chr22 | 18546350  | 23696229  | 700                | 7.36       |
| decipher | chr22 | 51045517  | 51187844  | 29                 | 4.91       |

|          |       |           |           |      |        |
|----------|-------|-----------|-----------|------|--------|
| decipher | chr3  | 195672230 | 197497869 | 282  | 6.47   |
| decipher | chr4  | 10002     | 2073670   | 502  | 4.11   |
| decipher | chr5  | 10002     | 11723854  | 749  | 15.64  |
| decipher | chr5  | 112101597 | 112221377 | 54   | 2.22   |
| decipher | chr5  | 126063046 | 126204952 | 6    | 23.65  |
| decipher | chr5  | 175130403 | 177456545 | 447  | 5.2    |
| decipher | chr7  | 72332744  | 74616901  | 229  | 9.97   |
| decipher | chr7  | 95533861  | 96779486  | 31   | 40.18  |
| decipher | chr8  | 8119296   | 11765719  | 452  | 8.07   |
| decipher | chr9  | 140403364 | 141153431 | 107  | 7.01   |
| decipher | chrX  | 460559    | 867875    | 2    | 203.66 |
| decipher | chrX  | 6441958   | 8167697   | 29   | 59.51  |
| decipher | chrX  | 102642052 | 103131767 | 30   | 16.32  |
| decipher | chrX  | 152749901 | 153390999 | 166  | 3.86   |
| devdel   | chr1  | 10001     | 10077413  | 1661 | 6.06   |
| devdel   | chr1  | 145288644 | 149783376 | 271  | 16.59  |
| devdel   | chr1  | 171733378 | 172333377 | 20   | 30     |
| devdel   | chr1  | 242433378 | 248833377 | 668  | 9.58   |
| devdel   | chr10 | 2610001   | 3210000   | 77   | 7.79   |
| devdel   | chr10 | 46929995  | 48429994  | 125  | 12     |
| devdel   | chr10 | 81610021  | 88910020  | 335  | 21.79  |
| devdel   | chr10 | 127760011 | 135400010 | 591  | 12.93  |
| devdel   | chr11 | 310001    | 3443424   | 1033 | 3.03   |
| devdel   | chr11 | 43983425  | 46063424  | 196  | 10.61  |
| devdel   | chr11 | 67753425  | 71282352  | 479  | 7.37   |
| devdel   | chr11 | 128044791 | 134844790 | 435  | 15.63  |
| devdel   | chr12 | 229740    | 3629739   | 460  | 7.39   |
| devdel   | chr12 | 8158734   | 8358733   | 39   | 5.13   |
| devdel   | chr12 | 65073734  | 68643733  | 178  | 20.06  |
| devdel   | chr13 | 19402001  | 20302000  | 28   | 32.14  |
| devdel   | chr13 | 20812001  | 21012000  | 5    | 40     |
| devdel   | chr13 | 113602000 | 115031898 | 258  | 5.54   |
| devdel   | chr14 | 36430250  | 37230249  | 37   | 21.62  |
| devdel   | chr14 | 104480248 | 106378955 | 429  | 4.43   |
| devdel   | chr15 | 22648637  | 32962708  | 526  | 19.61  |
| devdel   | chr15 | 72912947  | 75792945  | 511  | 5.64   |
| devdel   | chr15 | 75972946  | 78202945  | 163  | 13.68  |
| devdel   | chr15 | 83182946  | 84738996  | 185  | 8.41   |
| devdel   | chr15 | 85098997  | 85798996  | 143  | 4.9    |
| devdel   | chr15 | 99362478  | 102521392 | 444  | 7.11   |
| devdel   | chr16 | 160001    | 5209999   | 2694 | 1.87   |
| devdel   | chr16 | 14892500  | 18292499  | 210  | 16.19  |
| devdel   | chr16 | 21352500  | 30342499  | 967  | 9.3    |
| devdel   | chr16 | 83792500  | 90222499  | 1419 | 4.53   |
| devdel   | chr17 | 50001     | 4153251   | 927  | 4.43   |
| devdel   | chr17 | 14069276  | 15499275  | 51   | 28.04  |
| devdel   | chr17 | 16659276  | 25475873  | 624  | 14.13  |
| devdel   | chr17 | 29025875  | 30215887  | 133  | 8.95   |
| devdel   | chr17 | 34725888  | 36295000  | 187  | 8.39   |
| devdel   | chr17 | 43644218  | 44184217  | 97   | 5.57   |
| devdel   | chr17 | 57655219  | 60305218  | 244  | 10.86  |
| devdel   | chr17 | 72088406  | 81060000  | 2880 | 3.12   |
| devdel   | chr18 | 110001    | 5310000   | 268  | 19.4   |
| devdel   | chr18 | 6760001   | 7360000   | 126  | 4.76   |
| devdel   | chr18 | 70949021  | 77899009  | 382  | 18.19  |
| devdel   | chr19 | 199001    | 8789000   | 2816 | 3.05   |
| devdel   | chr19 | 54858189  | 59058188  | 1775 | 2.37   |
| devdel   | chr2  | 110001    | 1720993   | 117  | 13.77  |
| devdel   | chr2  | 3270994   | 3470993   | 22   | 9.09   |
| devdel   | chr2  | 45346497  | 46046496  | 42   | 16.67  |
| devdel   | chr2  | 57746497  | 61736496  | 171  | 23.33  |
| devdel   | chr2  | 96726274  | 97676273  | 203  | 4.68   |
| devdel   | chr2  | 100693569 | 108443568 | 406  | 19.09  |
| devdel   | chr2  | 110822712 | 110982711 | 23   | 6.96   |
| devdel   | chr2  | 111333938 | 113233529 | 127  | 14.96  |
| devdel   | chr2  | 165691755 | 166391754 | 40   | 17.5   |
| devdel   | chr2  | 235735262 | 243102476 | 1015 | 7.26   |
| devdel   | chr20 | 152001    | 1152000   | 157  | 6.37   |
| devdel   | chr20 | 60266606  | 62829556  | 959  | 2.67   |

|        |       |           |           |      |       |
|--------|-------|-----------|-----------|------|-------|
| devdel | chr21 | 21028130  | 21328129  | 1    | -     |
| devdel | chr21 | 42478131  | 47975572  | 1382 | 3.98  |
| devdel | chr22 | 17470001  | 25020000  | 1185 | 6.37  |
| devdel | chr22 | 25370001  | 26170000  | 78   | 10.26 |
| devdel | chr22 | 44268668  | 51244566  | 1137 | 6.14  |
| devdel | chr3  | 125001    | 1425000   | 64   | 20.31 |
| devdel | chr3  | 2125001   | 9825000   | 368  | 20.92 |
| devdel | chr3  | 195715604 | 197415603 | 263  | 6.46  |
| devdel | chr4  | 110001    | 7049099   | 1325 | 5.24  |
| devdel | chr4  | 9840903   | 10840902  | 86   | 11.63 |
| devdel | chr4  | 81730977  | 83130976  | 46   | 30.43 |
| devdel | chr4  | 184013007 | 184513006 | 45   | 11.11 |
| devdel | chr4  | 187263007 | 187963006 | 180  | 3.89  |
| devdel | chr5  | 47001     | 1447000   | 373  | 3.75  |
| devdel | chr5  | 3697001   | 4397000   | 2    | 350   |
| devdel | chr5  | 175517395 | 177517394 | 444  | 4.5   |
| devdel | chr5  | 180117395 | 180817394 | 118  | 5.93  |
| devdel | chr6  | 155001    | 5855001   | 292  | 19.52 |
| devdel | chr6  | 20742022  | 21142021  | 4    | 100   |
| devdel | chr6  | 92043280  | 104693307 | 303  | 41.75 |
| devdel | chr6  | 165330011 | 170908075 | 481  | 11.6  |
| devdel | chr7  | 10239     | 3833474   | 483  | 7.92  |
| devdel | chr7  | 5733475   | 6233475   | 100  | 5     |
| devdel | chr7  | 66482566  | 72272064  | 66   | 87.72 |
| devdel | chr7  | 72662065  | 74262064  | 223  | 7.17  |
| devdel | chr7  | 74962065  | 76662064  | 144  | 11.81 |
| devdel | chr8  | 160001    | 11912591  | 933  | 12.6  |
| devdel | chr8  | 53287448  | 53887447  | 33   | 18.18 |
| devdel | chr8  | 143252094 | 145979195 | 1149 | 2.37  |
| devdel | chr9  | 160001    | 6760000   | 644  | 10.25 |
| devdel | chr9  | 137810180 | 141080179 | 1282 | 2.55  |
| psych  | chr1  | 56280910  | 56291907  | 0    | -     |
| psych  | chr1  | 145010957 | 148684147 | 288  | 12.75 |
| psych  | chr11 | 88629802  | 88712013  | 0    | -     |
| psych  | chr15 | 23688945  | 28422026  | 237  | 19.97 |
| psych  | chr15 | 30212709  | 33212708  | 161  | 18.63 |
| psych  | chr16 | 15478051  | 16302002  | 154  | 5.35  |
| psych  | chr16 | 29592500  | 30301881  | 166  | 4.27  |
| psych  | chr17 | 34819671  | 36203752  | 186  | 7.44  |
| psych  | chr2  | 50146497  | 51490709  | 20   | 67.21 |
| psych  | chr22 | 18720001  | 21870000  | 498  | 6.33  |
| psych  | chr22 | 21980001  | 22450000  | 93   | 5.05  |
| psych  | chr22 | 30390001  | 31970000  | 406  | 3.89  |
| psych  | chr3  | 7208954   | 7222236   | 0    | -     |
| psych  | chr3  | 195715604 | 197345603 | 253  | 6.44  |
| psych  | chr5  | 64992221  | 65010764  | 2    | 9.27  |
| psych  | chr6  | 146615384 | 146652354 | 2    | 18.48 |
| psych  | chr7  | 72773571  | 74144177  | 201  | 6.82  |
| psych  | chr7  | 126737889 | 126748966 | 1    | -     |
| psych  | chr7  | 153864666 | 153933894 | 0    | -     |
| psych  | chr7  | 159038641 | 159117255 | 0    | -     |
| psych  | chr9  | 119260180 | 119860179 | 37   | 16.22 |

*asd: CNVs important to Autism Spectrum Disorder; devdel: CNVs important to developmental delay; psych: CNVs important to psychiatric disorders ; decipher: DECIPHER CNVs.*

### Examples of CNVs detected by the exome array

In each sub-figure, we compare the intensity data for a specific locus of a sample with the deletion or duplication (left panel) versus a sample with normal copy number (right panel). In each panel, the x-axis indicates genomic position of the probes and y-axis indicates the values of LRR (top) or BAF (bottom). The red vertical lines indicate CNV boundaries predicted from GWAS chips. The red dots indicate exome array probes predicted to be involved in a deletion. The blue dots indicate exome array probes predicted to be involved in a duplication. The gray dots indicate the corresponding probes in the normal sample.

Figure S3. Five examples of large CNVs detected by exome array

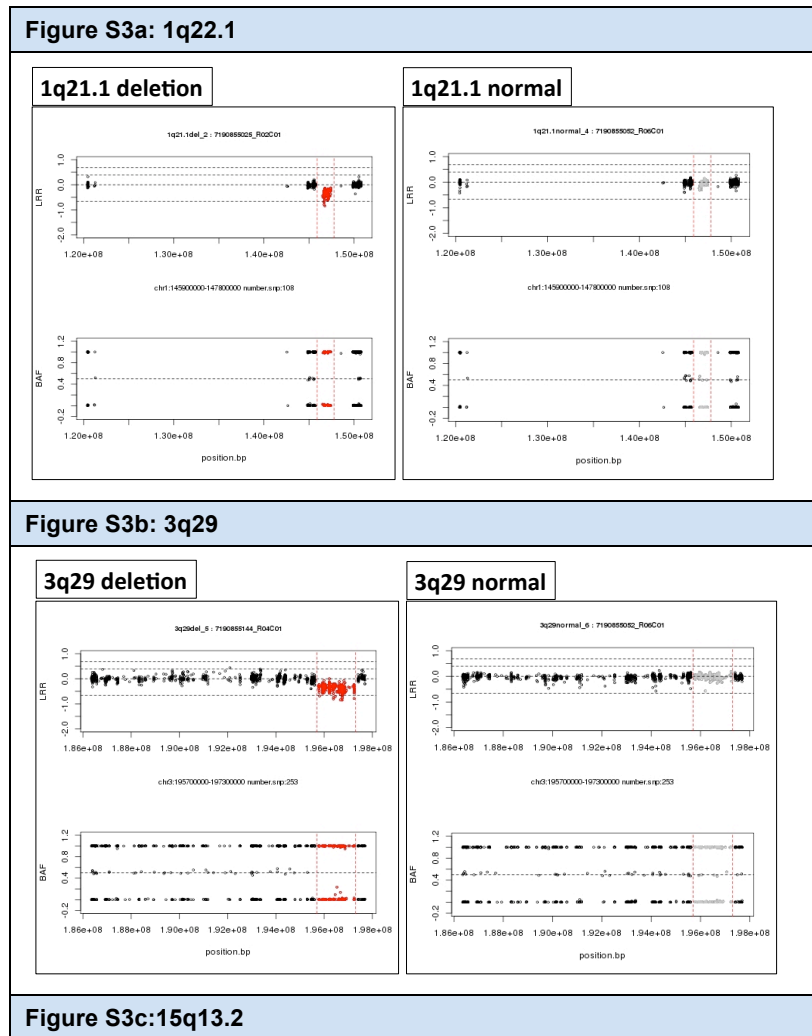

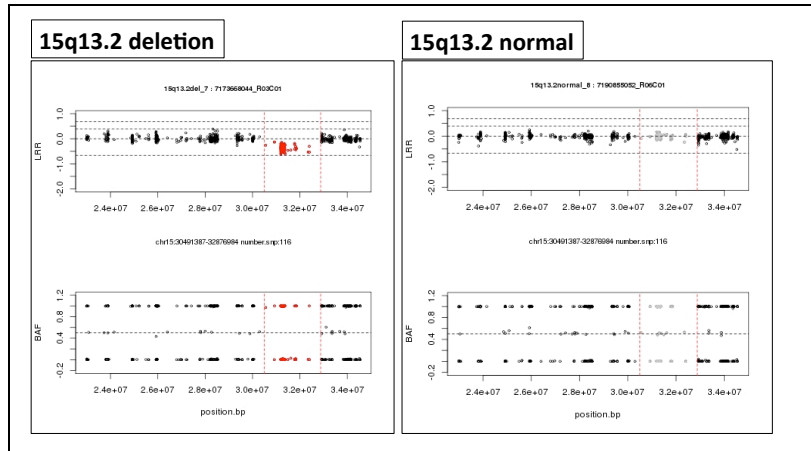

Figure S3d: 16p11.2

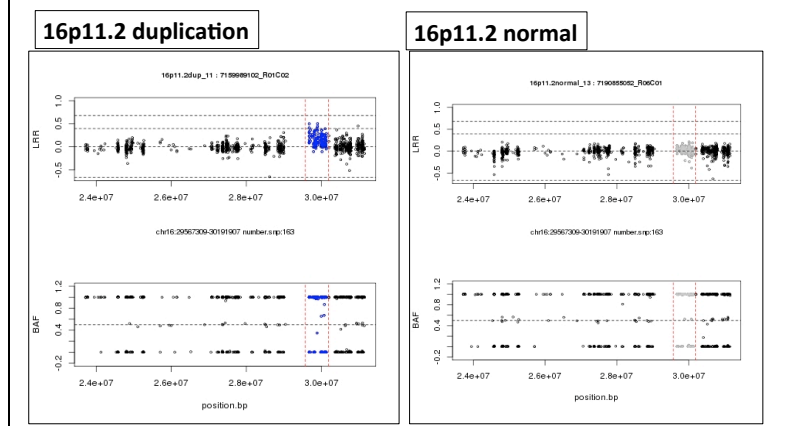

Figure S3e: 22q11.2

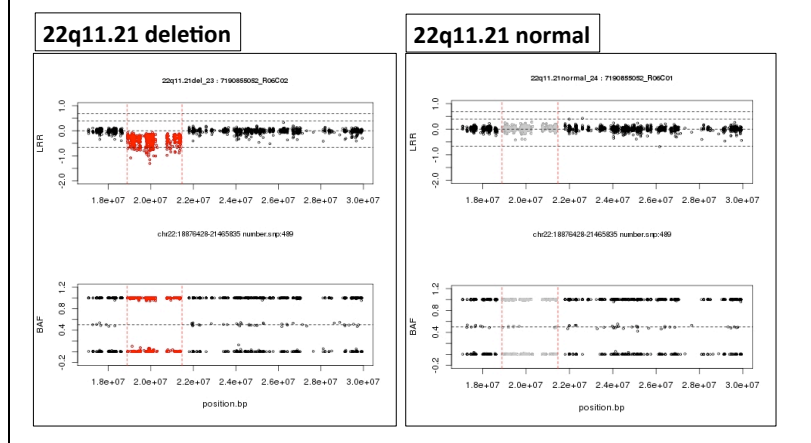

## Summary of simulation study

Table S5. *In silico* sex-mixing results for exome array

| #Probes | Kb     | Kb/SNP | Sensitivity |
|---------|--------|--------|-------------|
| 3       | 0.92   | 0.31   | 0.26        |
| 3       | 46.16  | 15.39  | 0.20        |
| 3       | 78.35  | 26.12  | 0.13        |
| 5       | 3.58   | 0.71   | 0.95        |
| 5       | 8.0    | 1.96   | 0.91        |
| 5       | 132.58 | 26.52  | 0.77        |
| 10      | 3.89   | 0.39   | 0.998       |
| 10      | 16.14  | 1.64   | 0.999       |
| 10      | 111.5  | 11.15  | 1           |
| 15      | 0.99   | 0.01   | 1           |
| 15      | 26.15  | 1.74   | 1           |
| 20      | 27.16  | 1.43   | 1           |
| 20      | 115.89 | 5.79   | 1           |
| 30      | 121.48 | 4.05   | 1           |
| 35      | 12.9   | 0.37   | 1           |

*In silico* sex-mixing experiments: After excluding the pseudo-autosomal regions (in order to remove natural copy number variation), we used a total 5,041 chromosome X probes. Among the 9100 Swedish samples that passed QC, we selected samples with a standard deviation of LRR <0.35 for the chrX probe intensities to form the simulation pool.

- To estimate specificity, we created 1000 simulated independent samples of normal copy number. In each simulation, a female sample was randomly chosen and its intensities of all chrX probes were randomly permuted to create a “CNV-free” chromosome. After applying the CNV detecting pipeline, any CNV detected from such chromosome was regarded as ‘false positive’.
- To estimate sensitivity, we created 1000 simulated independent samples, where each contains heterozygous deletions spanning N probes at known locations. Each simulation was generated as following: (1) randomly choose a female sample; (2) randomly choose a male sample; (3) randomly permute intensities of all chrX probes to create a “CNV-free” chromosome; (4) Replace consecutive N probes from the female sample with the intensities of the corresponding probes from a male sample to create a virtual sample with pseudo-deletions at known locations. After applying the CNV detecting pipeline, sensitivity was computed by the proportion of “true positive” deletions of all predicted deletions.

*in silico* sex-mixing results:

- The rate of false positive was obtained as 0.03 in unfiltered CNVs, and 0.003 in dataset filtered by confidence score  $\geq 10$ .
- In the filtered dataset (confidence score  $\geq 10$ ), we observed:
  - High sensitivity for deletions spanning  $\geq 10$  exome array probes ( $\geq 99.8\%$  simulated events were detected).
  - Reduced sensitivity for CNVs with poor probe coverage (e.g. kb/snp < 20)
  - Reduced sensitivity for CNVs as sample specific noise as measured in the standard deviation of probe intensities increases (data not shown).

## Summary of CNVs from exome & GWAS arrays

Table S6. Comparison of CNV datasets used in Figure 1

| Dataset                                | Size Range <sup>4</sup> | All CNVs |         | Deletions   |               | Duplications   |               |
|----------------------------------------|-------------------------|----------|---------|-------------|---------------|----------------|---------------|
|                                        |                         | Total    | Mbp     | Total (%)   | Mbp           | Total (%)      | Mbp           |
| GWAS <sup>1</sup>                      | ≥20kb                   | 20,665   | 2,865.5 | 9,942 (48%) | 1,130.5 (39%) | 10,723 (52%)   | 1735 (61%)    |
| GWAS-genic <sup>1,2</sup>              | ≥20kb                   | 12,553   | 2,142.8 | 5,182 (41%) | 745.2 (35%)   | 7,371 (59%)    | 1,397.6 (65%) |
| GWAS-genic & detectable <sup>1,3</sup> | ≥20kb                   | 5,758    | 939.9   | 1,948 (34%) | 275.2 (29%)   | 3,810 (66%)    | 664.8 (71%)   |
| Exome array                            | ≥0.15kb                 | 26,594   | 1,298.5 | 4,707 (18%) | 271.3 (21%)   | 21,887 (82.3%) | 1,027.2 (79%) |
| Exome array                            | ≥20kb                   | 12,503   | 1,207.5 | 2,321 (19%) | 256.4 (21%)   | 10,182 (81%)   | 951 (79%)     |

<sup>1</sup> GWAS array CNVs were generated using Birdseye. This was the dataset used in Figure 1 of the main text.

<sup>2</sup> GWAS Birdseye CNVs that intersect ≥1 gene. For exome array dataset, all but 13 CNVs are genic.

<sup>3</sup> GWAS Birdseye CNVs that intersect ≥1 gene and had ≥1 exome array probe/20kb of its length. This subset can be most reliably detected (Figure 1 of main text).

<sup>4</sup> GWAS Birdseye CNVs were filtered to be ≥20kb. The smallest CNVs in the exome array dataset are 0.15kb. The last row of Table S3 restricted the exome array CNVs to those that are ≥20kb for the purpose of comparison.

<sup>5</sup> By comparing the results between “GWAS-genic & detectable” and “Exome array”, we observed that the relative proportion of duplications was more comparable after controlling for difference in probe design.

Figure S4. Comparison of CNV datasets used in Figure 1

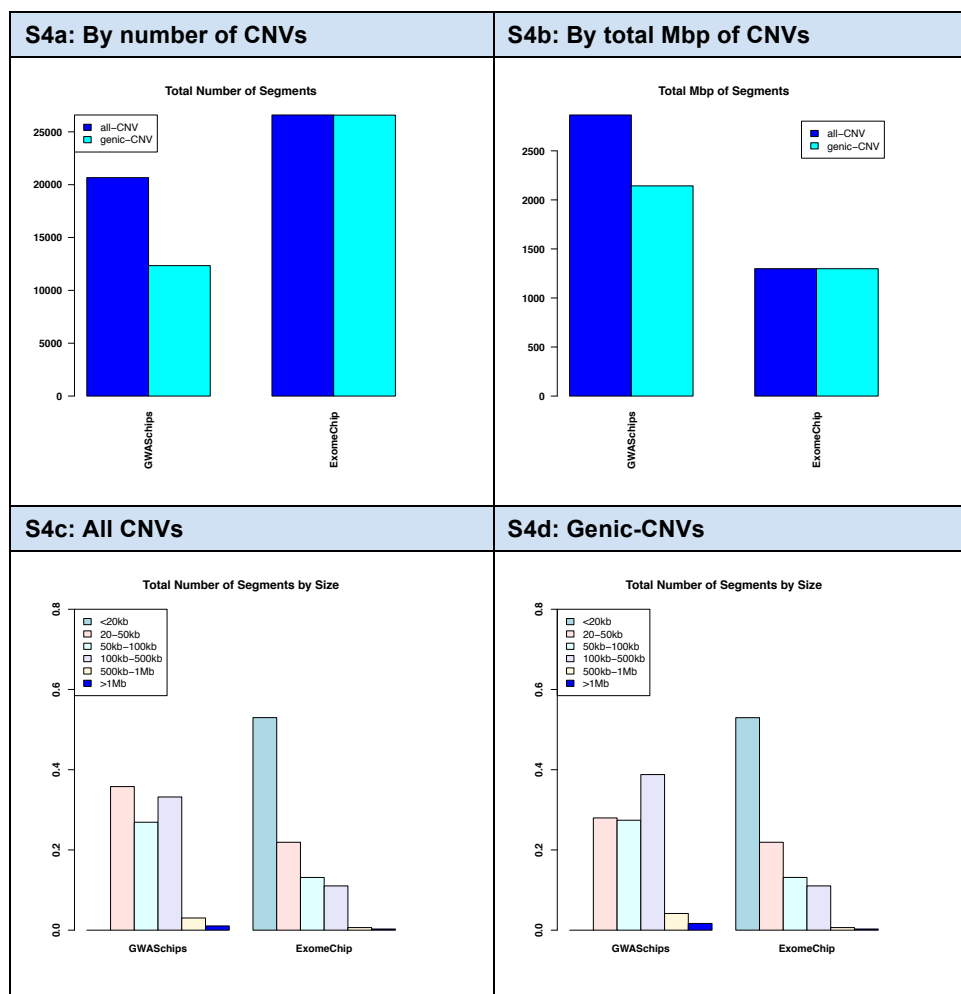

<sup>1</sup> GWAS array CNVs were generated using Birdseye. This was the dataset used in Figure 1 of the main text.

Figure S5. CNV dataset comparison by genotyping batch, array type, and CNV calling algorithm

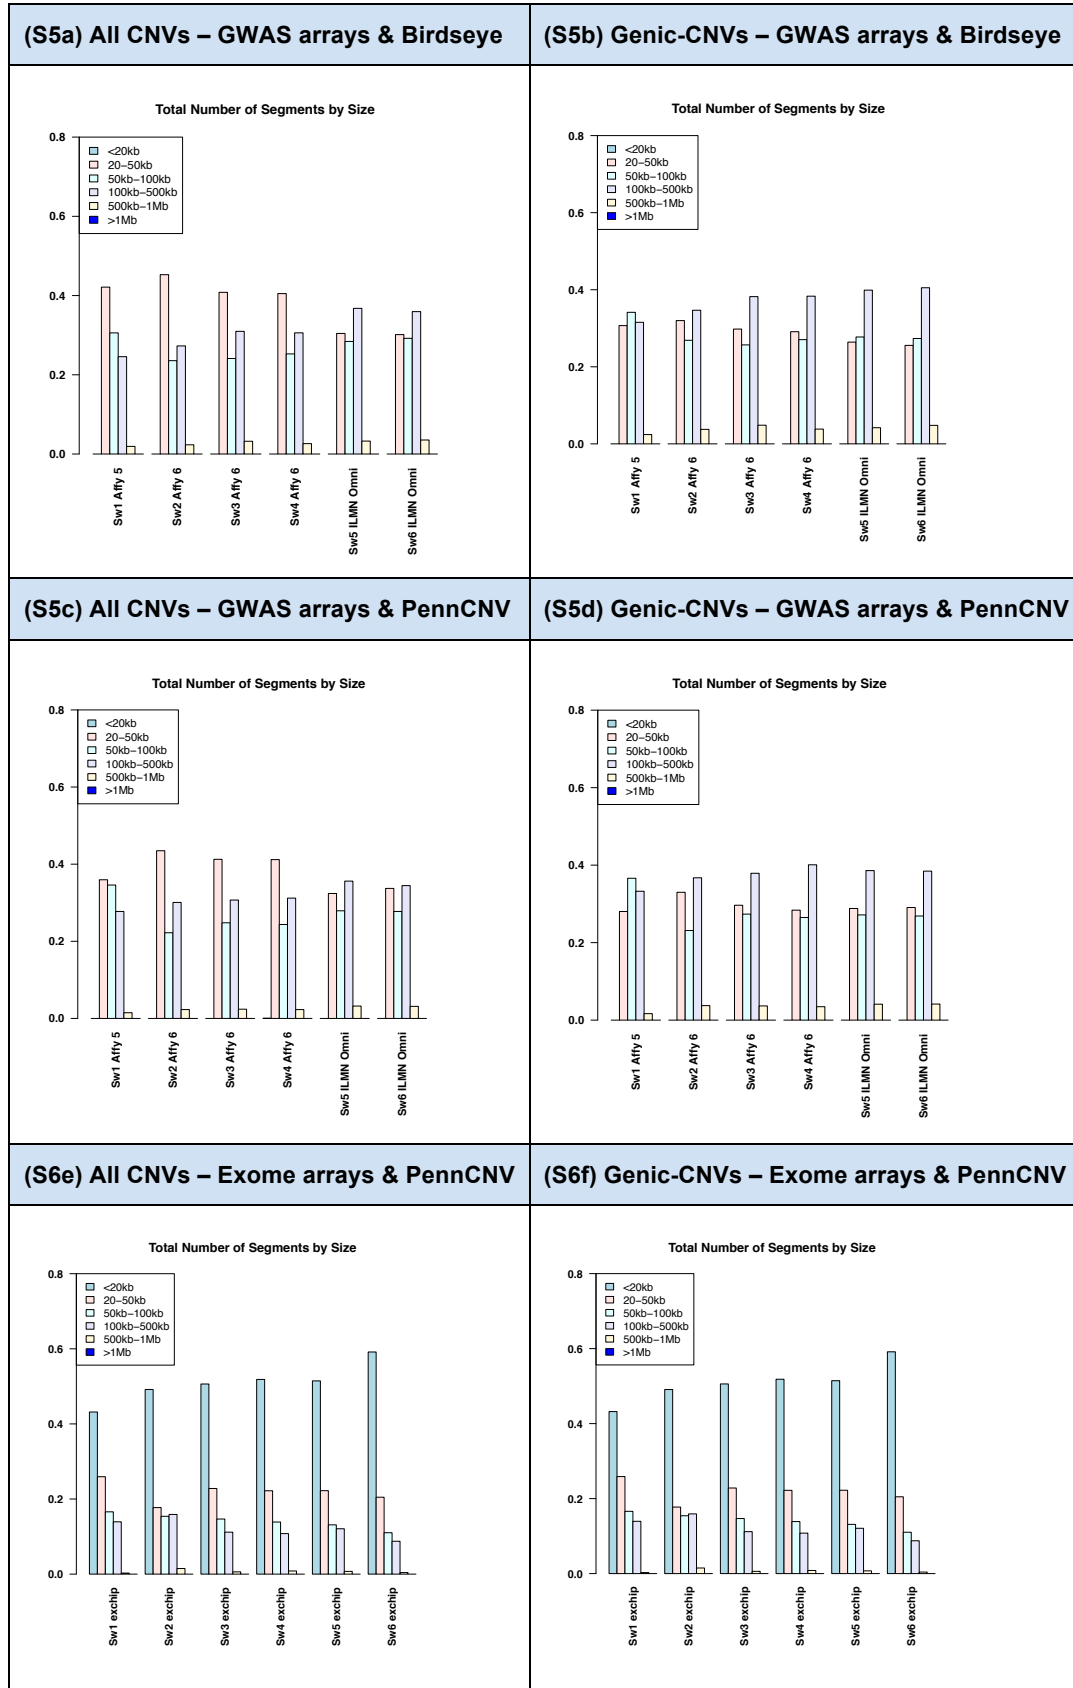



### **Summary results of comparing exome array CNVs to GWAS array CNVs stratified by array type and by CNV calling algorithm.**

We contrasted exome array CNVs to GWAS array CNVs stratified by GWAS array type (Affymetrix or Illumina) and by CNV calling algorithm (Birdseye or PennCNV). As discussed above, we considered GWAS array CNVs as the reference for estimating sensitivity and specificity. We estimated sensitivity by computing the proportion of GWAS CNVs captured by the exome array and specificity by the proportion of exome array CNVs overlapping with any GWAS CNV. We did for all CNVs and after stratifying by size and deletion/duplication type. Key results for genic CNVs  $\geq 400$  kb are summarized in **Table S7** below. **Figures S6 through S9** display the full results of stratified analysis using Sw2,3,4 subjects and using Sw5,6 subjects.

**Table S7. Summary results of comparing for genic CNVs  $\geq 400$ kb**

| Wave               | # Subjects (% Total) | GWAS arrays                      |                   | Deletion    |             | Duplication |             |
|--------------------|----------------------|----------------------------------|-------------------|-------------|-------------|-------------|-------------|
|                    |                      | Array platform                   | Calling algorithm | Sensitivity | Specificity | Sensitivity | Specificity |
| Sw1 <sup>a,b</sup> | 307 (3.4%)           | Affymetrix 5.0                   | PennCNV           | 1.00        | 1.00        | 0.86        | 0.75        |
| Sw1 <sup>a,b</sup> | 307 (3.4%)           | Affymetrix 5.0                   | Birdseye          | 0.50        | 0           | 0.67        | 0.25        |
| Sw2,3,4            | 3,030 (33.3%)        | Affymetrix 6.0                   | PennCNV           | 0.94        | 0.59        | 0.78        | 0.84        |
| Sw2,3,4            | 3,030 (33.3%)        | Affymetrix 6.0                   | Birdseye          | 0.96        | 0.60        | 0.82        | 0.83        |
| Sw5,6              | 5,763 (63.3%)        | Illumina Omni Express            | PennCNV           | 0.98        | 0.77        | 0.86        | 0.84        |
| Sw5,6              | 5,763 (63.3%)        | Illumina Omni Express            | Birdseye          | 0.99        | 0.70        | 0.89        | 0.77        |
| Sw1-6              | 9,100 (100%)         | Affymetrix 5, 6<br>Illumina Omni | PennCNV           | 0.96        | 0.73        | 0.83        | 0.84        |
| Sw1-6 <sup>c</sup> | 9,100 (100%)         | Affymetrix 5,6<br>Illumina Omni  | Birdseye          | 0.95        | 0.68        | 0.80        | 0.80        |

- The specificities estimated using Sw1 subjects are based on only 1 eligible deletion and 4 eligible duplications. Thus these estimates are not useful.
- The sensitivities estimated using Sw1 subjects is based on 4 deletions and 6 duplications from Birdseye and 2 deletions and 7 duplications from PennCNV. Thus these estimates are not useful.
- Full results for Sw1-6 using Birdseye are displayed in Figure 1 of the main manuscript.

**Figure legend. Figures S6 through S9** were created using the same style as **Figure 2** of the main manuscript. CNV type is color coded (all CNVs in black, deletions in red, and duplications in blue) and CNV size bin is indicated by the x-axis. Sensitivity and specificity. (a) Sensitivity to detect any GWAS CNVs. (b) Specificity of the exome array CNV dataset to detect any GWAS CNV, estimated by computing the proportion of exome array CNVs overlapping any GWAS CNVs for each size bin of the exome array CNVs. (c) Sensitivity to detect GWAS CNVs limited to genic CNVs and accounting for probe coverage (intersect  $\geq 1$  gene and  $\geq 1$  exome array probe/20kb of its length). (d) Specificity of the exome array CNV dataset compared to genic CNVs from GWAS arrays. Burden tests. The y-axis shows fold changes for CNV burden of cases versus controls, and the x-axes indicate CNV size bins (total numbers of CNVs per bin in parentheses). (e) Burden test using genic CNVs from the GWAS dataset. (f) Burden test using genic CNVs from the exome array dataset. Note that the X-axes stop at the particular bin when the total numbers of CNVs per bin (in parentheses) are comparable between (e) and (f) and hence the total number of bins displayed in (e) and (f) are different.

Figure S6: Comparing subsets of CNV calls: Sw2,3,4; Illumina Exome arrays using PennCNV versus GWAS Affymetrix 6.0 arrays using Birdseye

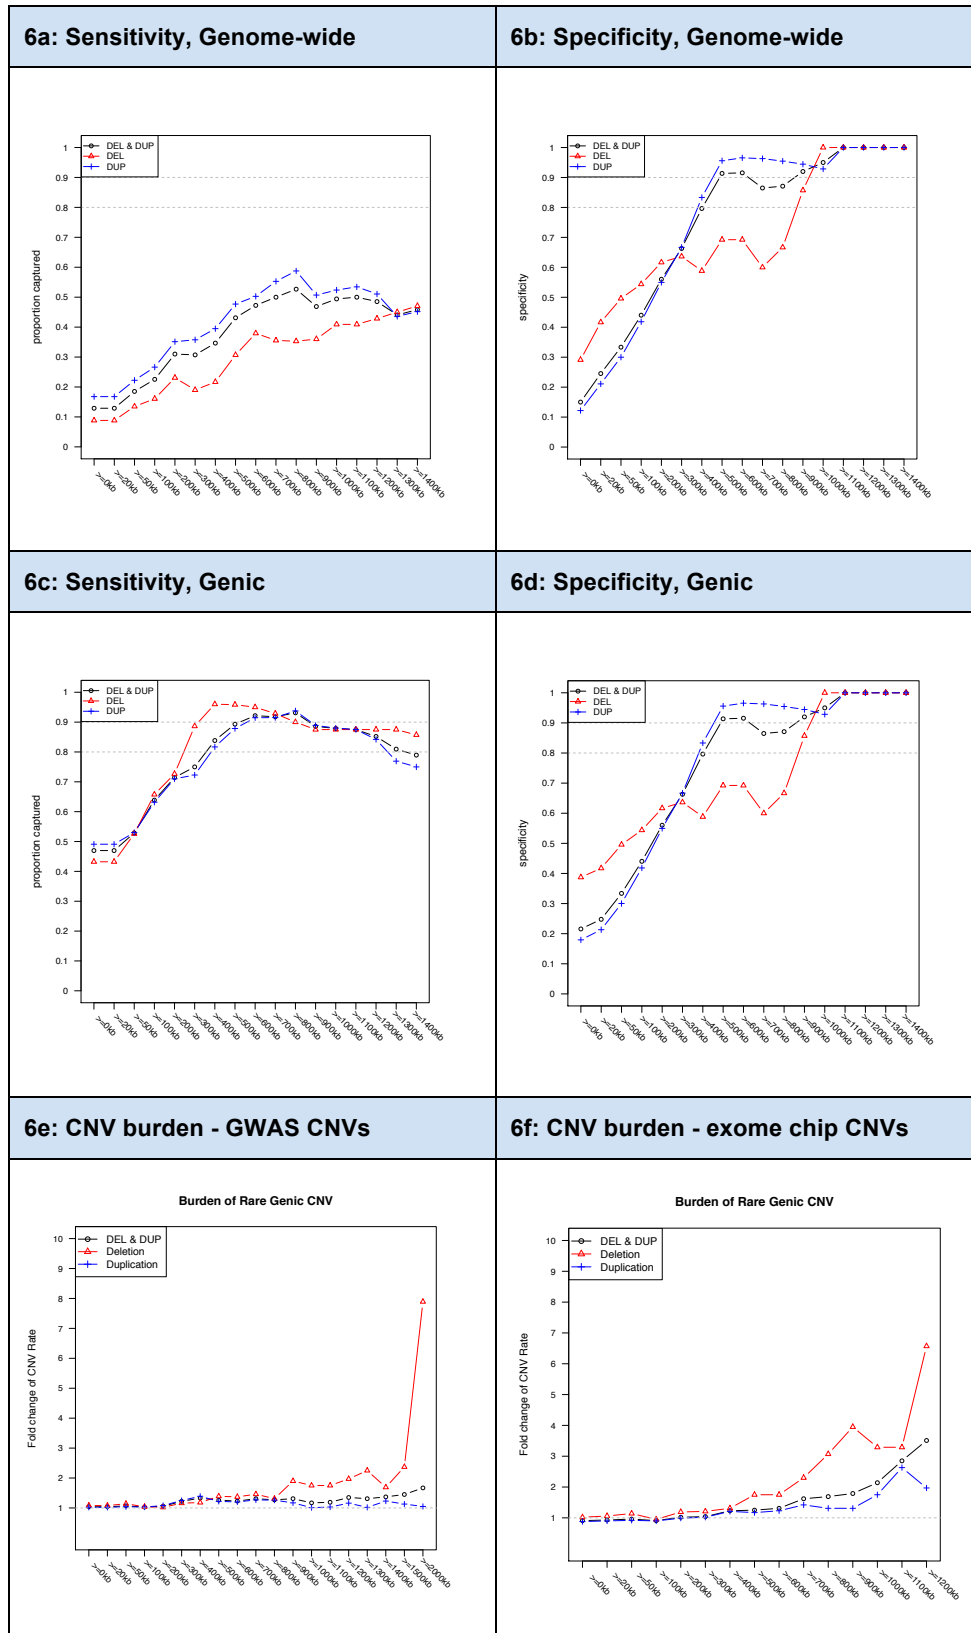

Figure S7: Comparing subsets of CNV calls: Sw2,3,4; Illumina Exome arrays using PennCNV versus GWAS Affymetrix 6.0 arrays using PennCNV

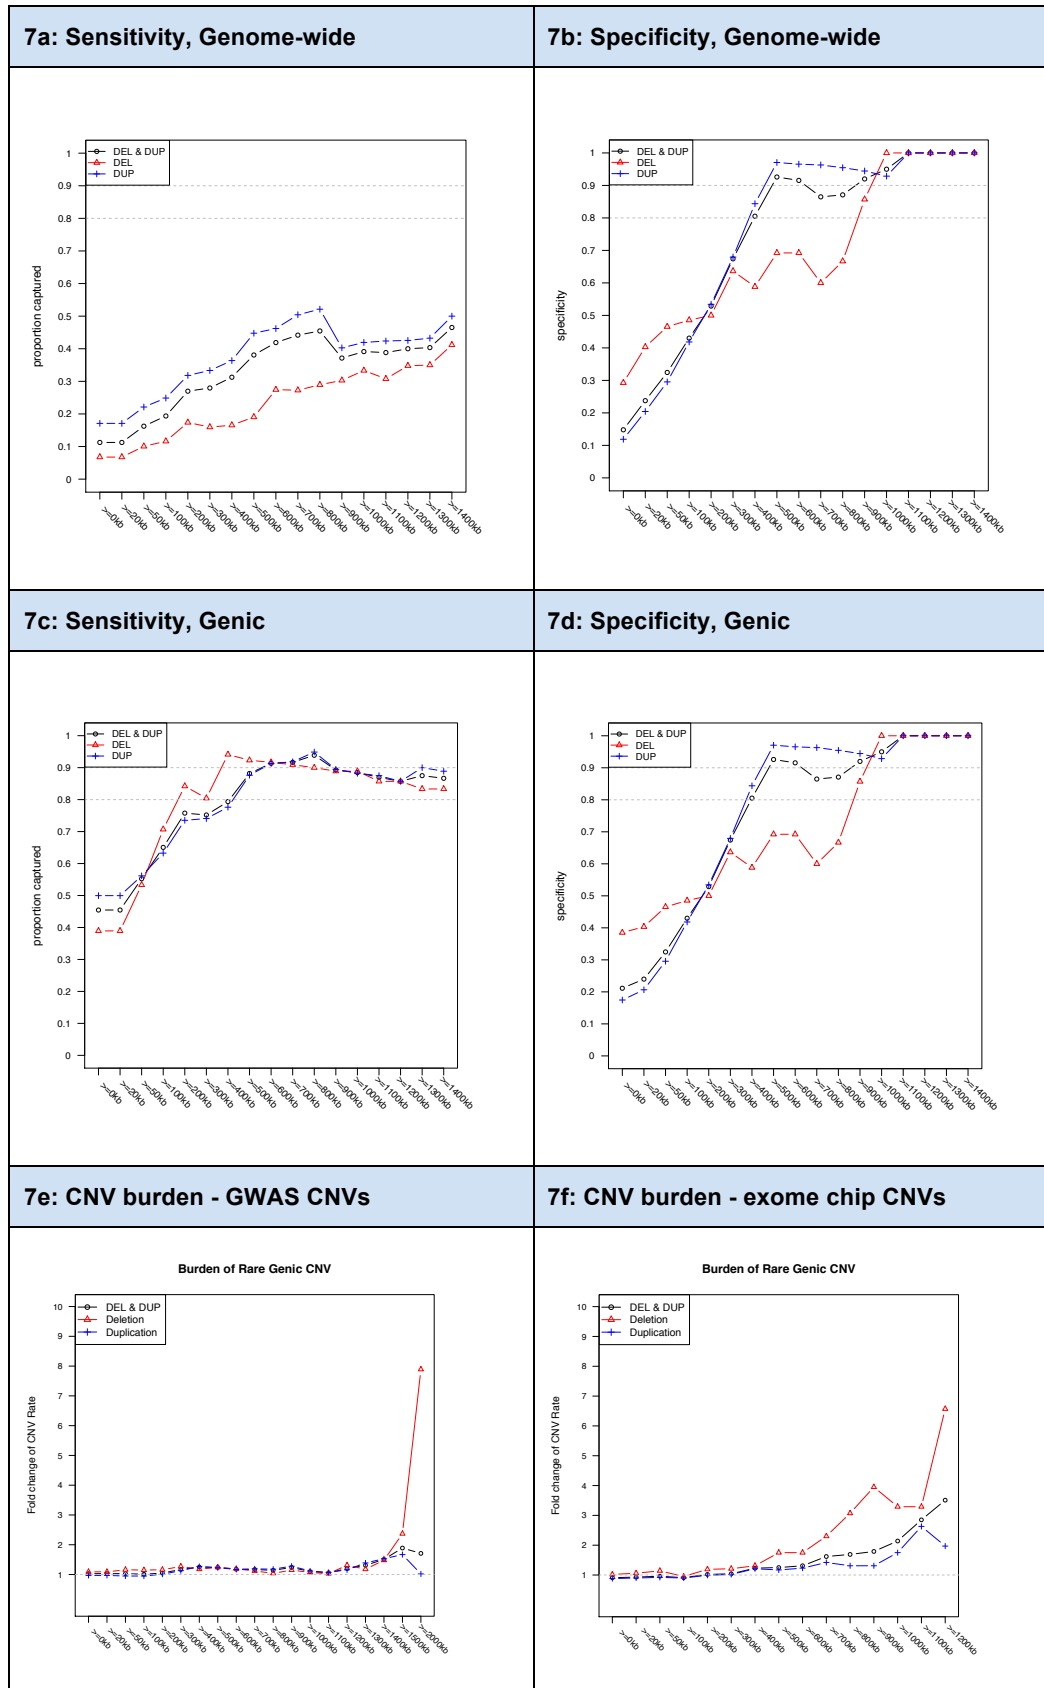

**Figure S8: Comparing subsets of CNV calls: Sw5,6; Illumina Exome arrays using PennCNV versus GWAS Illumina Omni Express arrays using Birdseye**

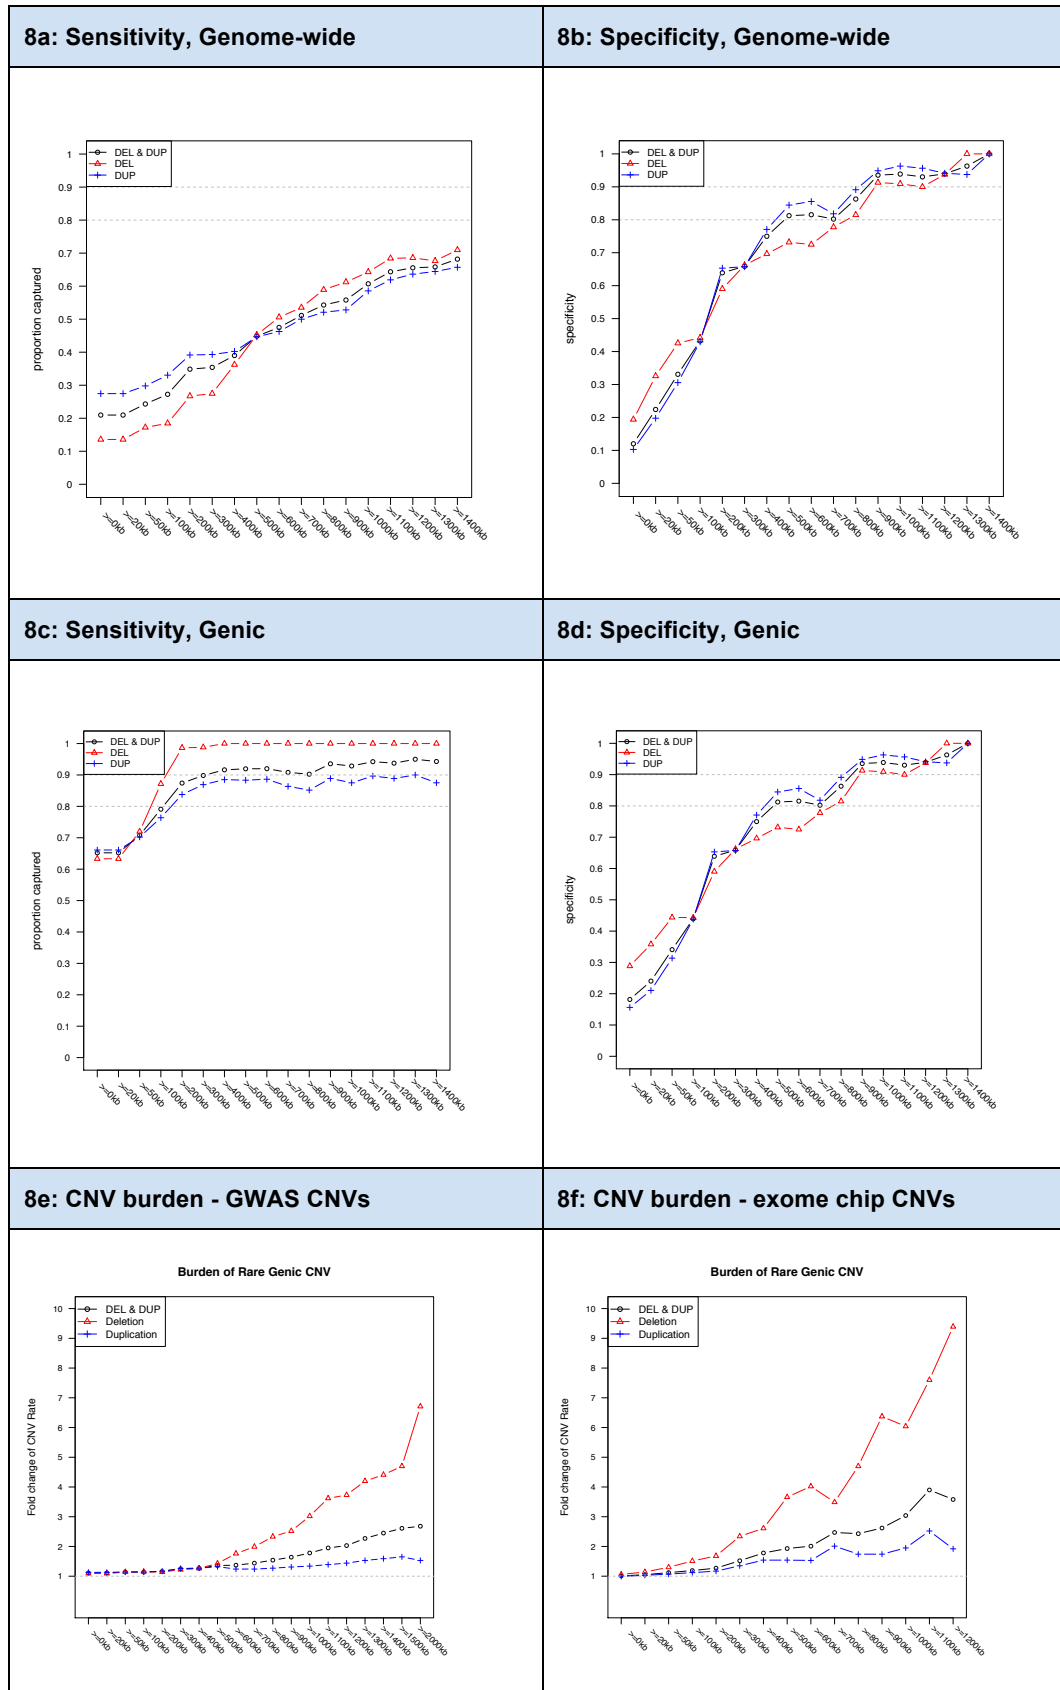

**Figure S9: Comparing subsets of CNV calls: Sw5,6; Illumina Exome arrays using PennCNV versus GWAS Illumina Omni Express arrays using PennCNV**

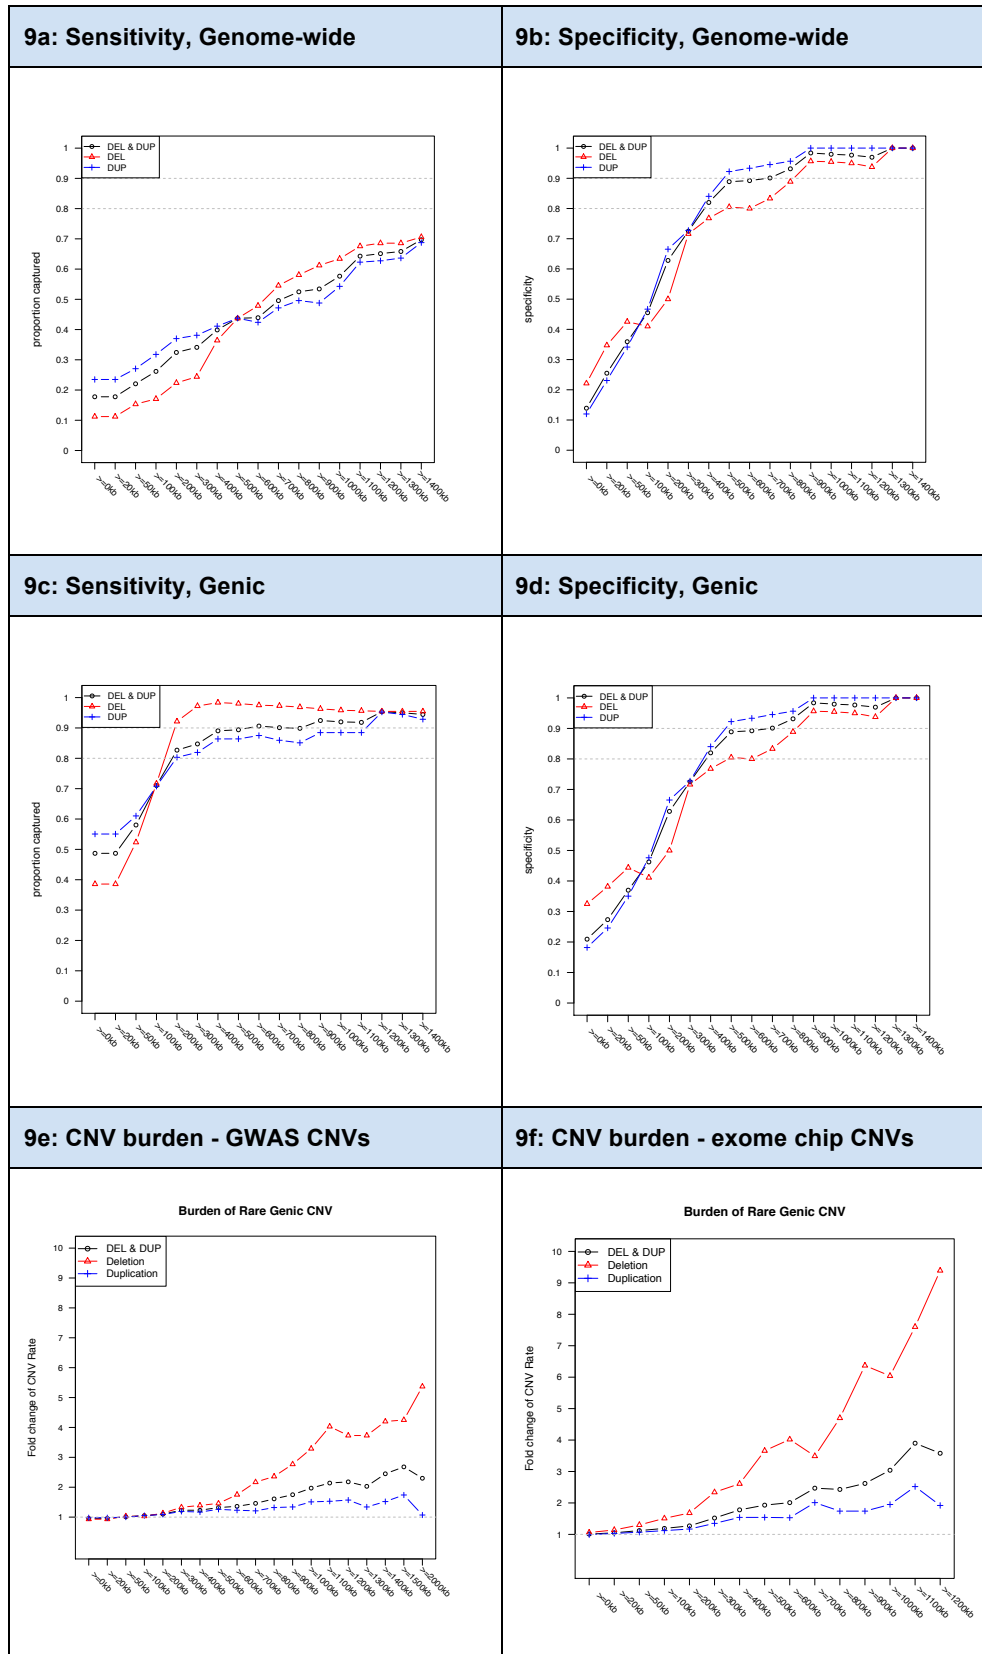

Figure S10: Comparing distributions of LRR\_SD by GWAS genotyping batches and array type.

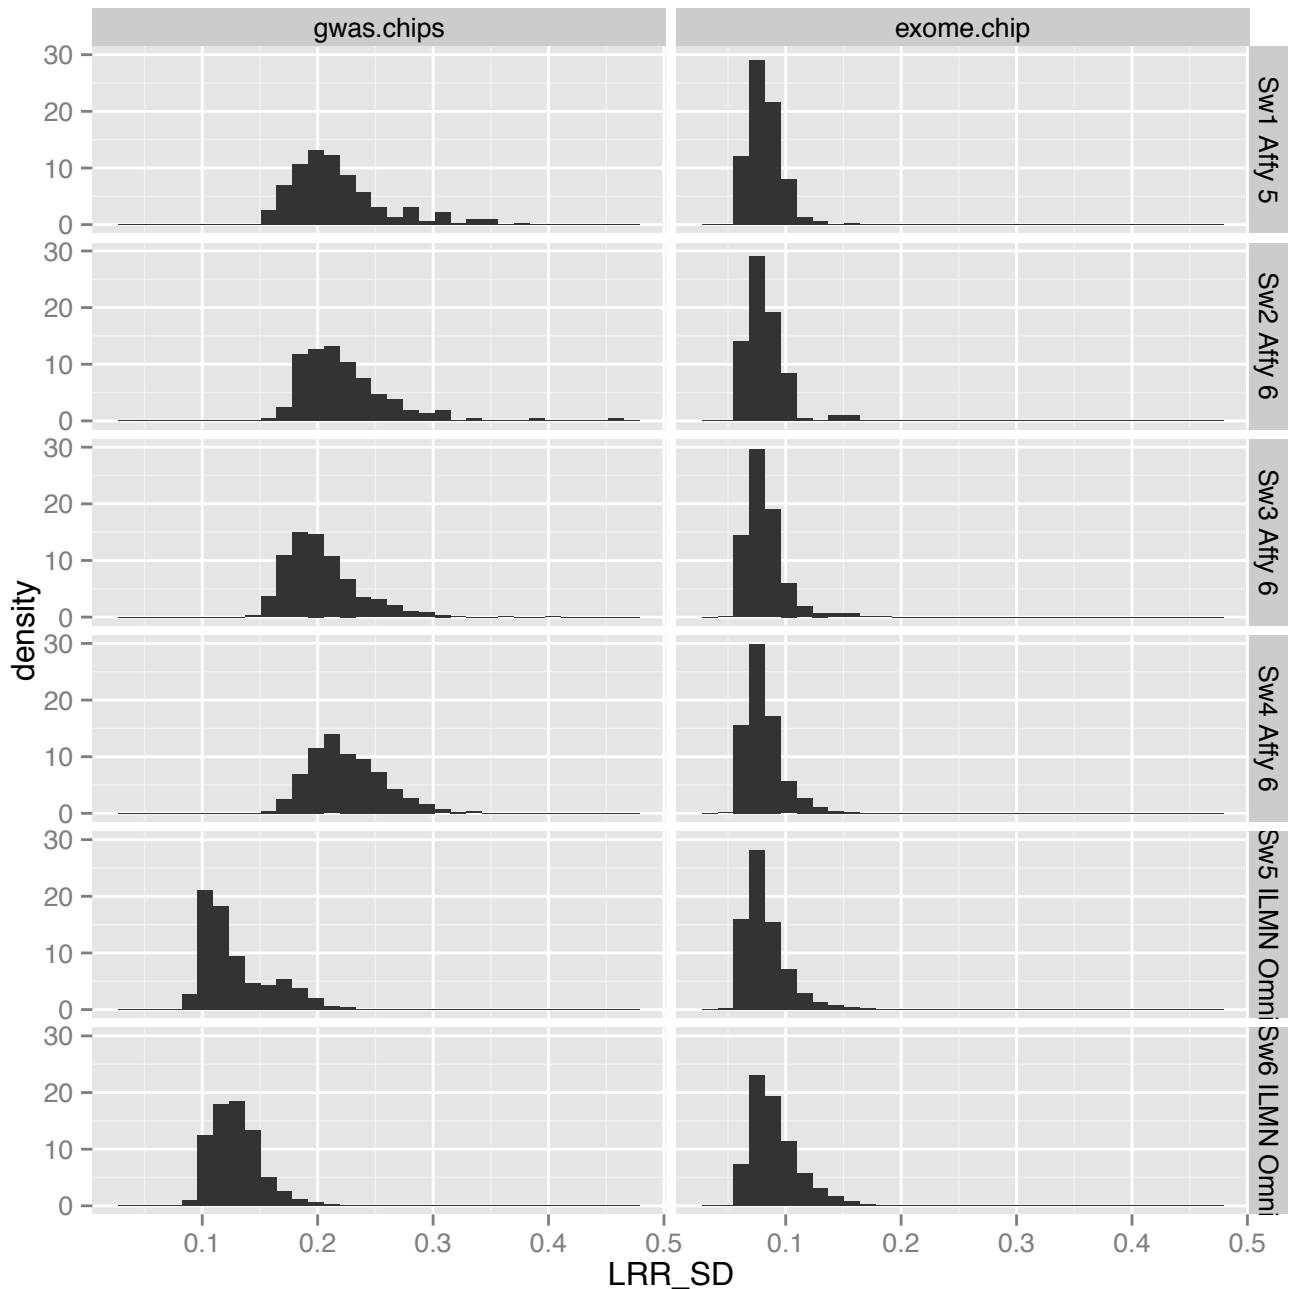

All 9,100 subjects had both exome array genotyping and GWAS array genotyping. For each sample, LRR\_SD was computed as the standard deviation of log R Ratio (LRR) and was used as a measure of experimental noise. GWAS arrays (left panels) showed variability between genotyping batches as well as genotyping platforms (Affymetrix vs Illumina). In contrast, exome array genotyping showed more consistency for the entire cohort, as all samples were scanned on a common platform within a relatively short time window thereby minimizing platform and batch variation that can complicate CNV meta-analysis.

### Summary of association scan

Using exome array CNVs as input, we scanned the genome using single-marker analysis as implemented in PLINK. A novel nominal association was detected using the exome arrays at 11q12.2 ( $P = 0.0069$ , multiple testing adjusted  $P = 0.18$ ). Next, we used the `-segment-spanning` option in PLINK to extract all events at this locus from both exome array data and GWAS array data (Birdseye). **Table S8** displays the output. High concordance was observed. Six deletions in cases with SCZ were detected with the smallest common region spanning chr11:60531180-60620982. All six deletions were also detected by GWAS arrays with the smallest common region spanning chr11: 60547604-60624496.

**Table S8 PLINK output of CNV events at a nominal novel locus**

| Exome Arrays |         |     |      |     |          |          |         |      |        |
|--------------|---------|-----|------|-----|----------|----------|---------|------|--------|
| POOL         | FID     | IID | PHE  | CHR | BP1      | BP2      | KB      | TYPE | SCORE  |
| S1           | PT-2M26 | 1   | 2    | 11  | 60531180 | 60620982 | 89.802  | DEL  | 42.307 |
| S1           | PT-OQ42 | 1   | 2    | 11  | 60531180 | 60620982 | 89.802  | DEL  | 43.599 |
| S1           | PT-ERMN | 1   | 2    | 11  | 60525786 | 60620982 | 95.196  | DEL  | 104.7  |
| S1           | PT-8VXY | 1   | 2    | 11  | 60525786 | 60620982 | 95.196  | DEL  | 34.772 |
| S1           | PT-BP9G | 1   | 2    | 11  | 60525786 | 60620982 | 95.196  | DEL  | 90.776 |
| S1           | PT-L116 | 1   | 2    | 11  | 60525786 | 60620982 | 95.196  | DEL  | 73.518 |
| S1           | CON     | 6   | 6:00 | 11  | 60531180 | 60620982 | 89.802  | NA   | NA     |
| S1           | UNION   | 6   | 6:00 | 11  | 60525786 | 60620982 | 95.196  | NA   | NA     |
| GWAS Arrays  |         |     |      |     |          |          |         |      |        |
| POOL         | FID     | IID | PHE  | CHR | BP1      | BP2      | KB      | TYPE | SCORE  |
| S1           | PT-2M26 | 1   | 2    | 11  | 60526252 | 60628754 | 102.502 | DEL  | 74.63  |
| S1           | PT-OQ42 | 1   | 2    | 11  | 60528162 | 60624496 | 96.334  | DEL  | 30.93  |
| S1           | PT-ERMN | 1   | 2    | 11  | 60528162 | 60624496 | 96.334  | DEL  | 33.53  |
| S1           | PT-8VXY | 1   | 2    | 11  | 60526252 | 60628754 | 102.502 | DEL  | 72.1   |
| S1           | PT-BP9G | 1   | 2    | 11  | 60526252 | 60628754 | 102.502 | DEL  | 147.26 |
| S1           | PT-L116 | 1   | 2    | 11  | 60547604 | 60624496 | 76.892  | DEL  | 45.62  |
| S1           | CON     | 6   | 6:00 | 11  | 60547604 | 60624496 | 76.892  | NA   | NA     |
| S1           | UNION   | 6   | 6:00 | 11  | 60526252 | 60628754 | 102.502 | NA   | NA     |

**Figure S11** (page 24) compares probe intensities of representative deletions between exome and GWAS arrays (one from Affymetrix 6 and one from Illumina OmniExpress). **Figure S12** (page 25) displays probe intensities for all 6 deletions detected from exome arrays. In each figure, the x-axis indicates genomic position of the probes and y-axis indicates the values of normalized and transformed intensities (i.e. LRR). The red dots indicate probes predicted to be involved in a deletion. The blue vertical lines indicate the predicted CNV boundary.

**Figure S11: Probe intensities from exome and GWAS arrays at chr11q12.2**

*PT-BP9G was genotyped on Affymetrix 6.0 array. PT-ERMN was genotyped on Illumina Omni Express array.*

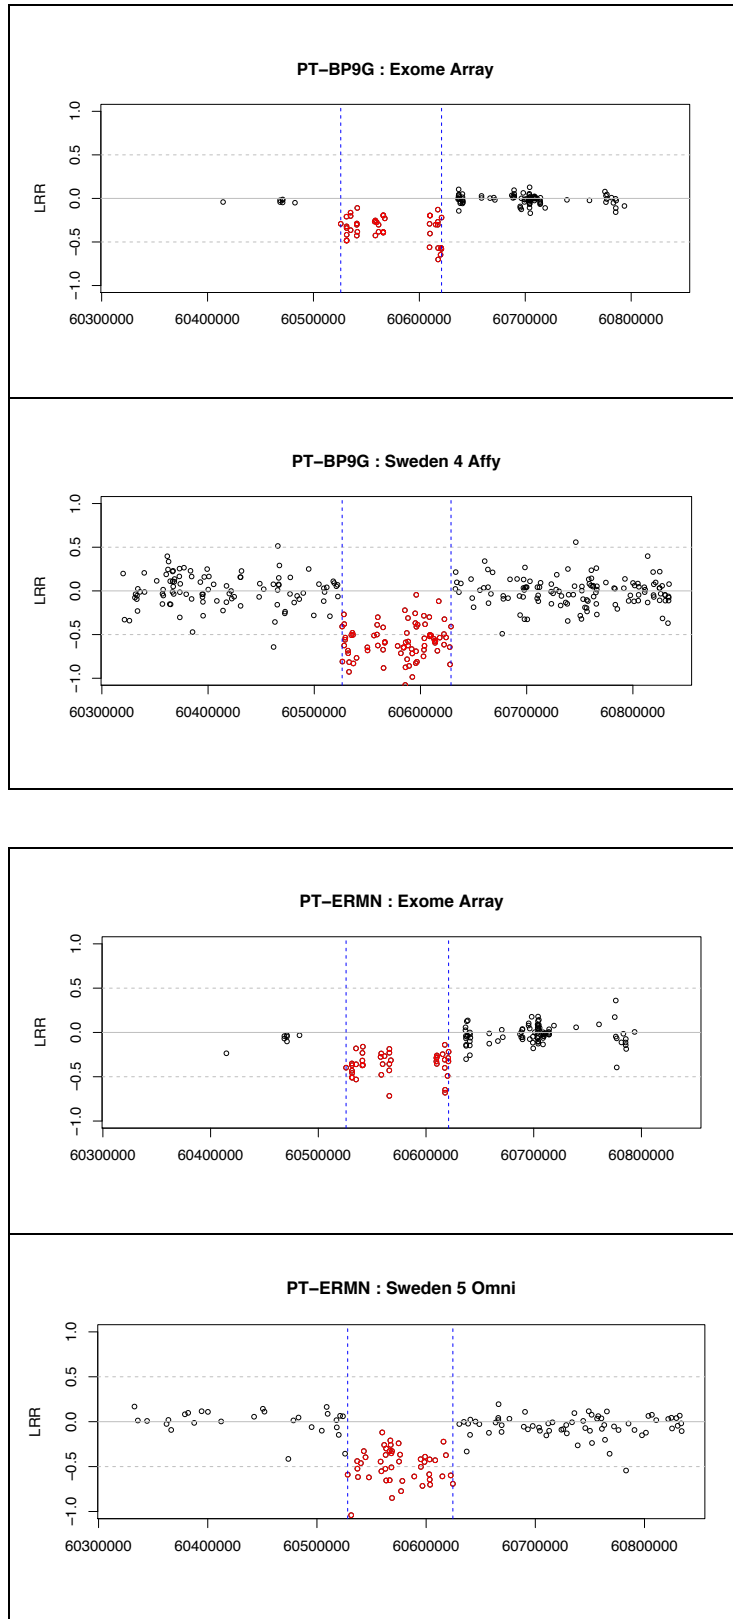



Figure S12: Probe intensities from exome arrays at chr11q12.2

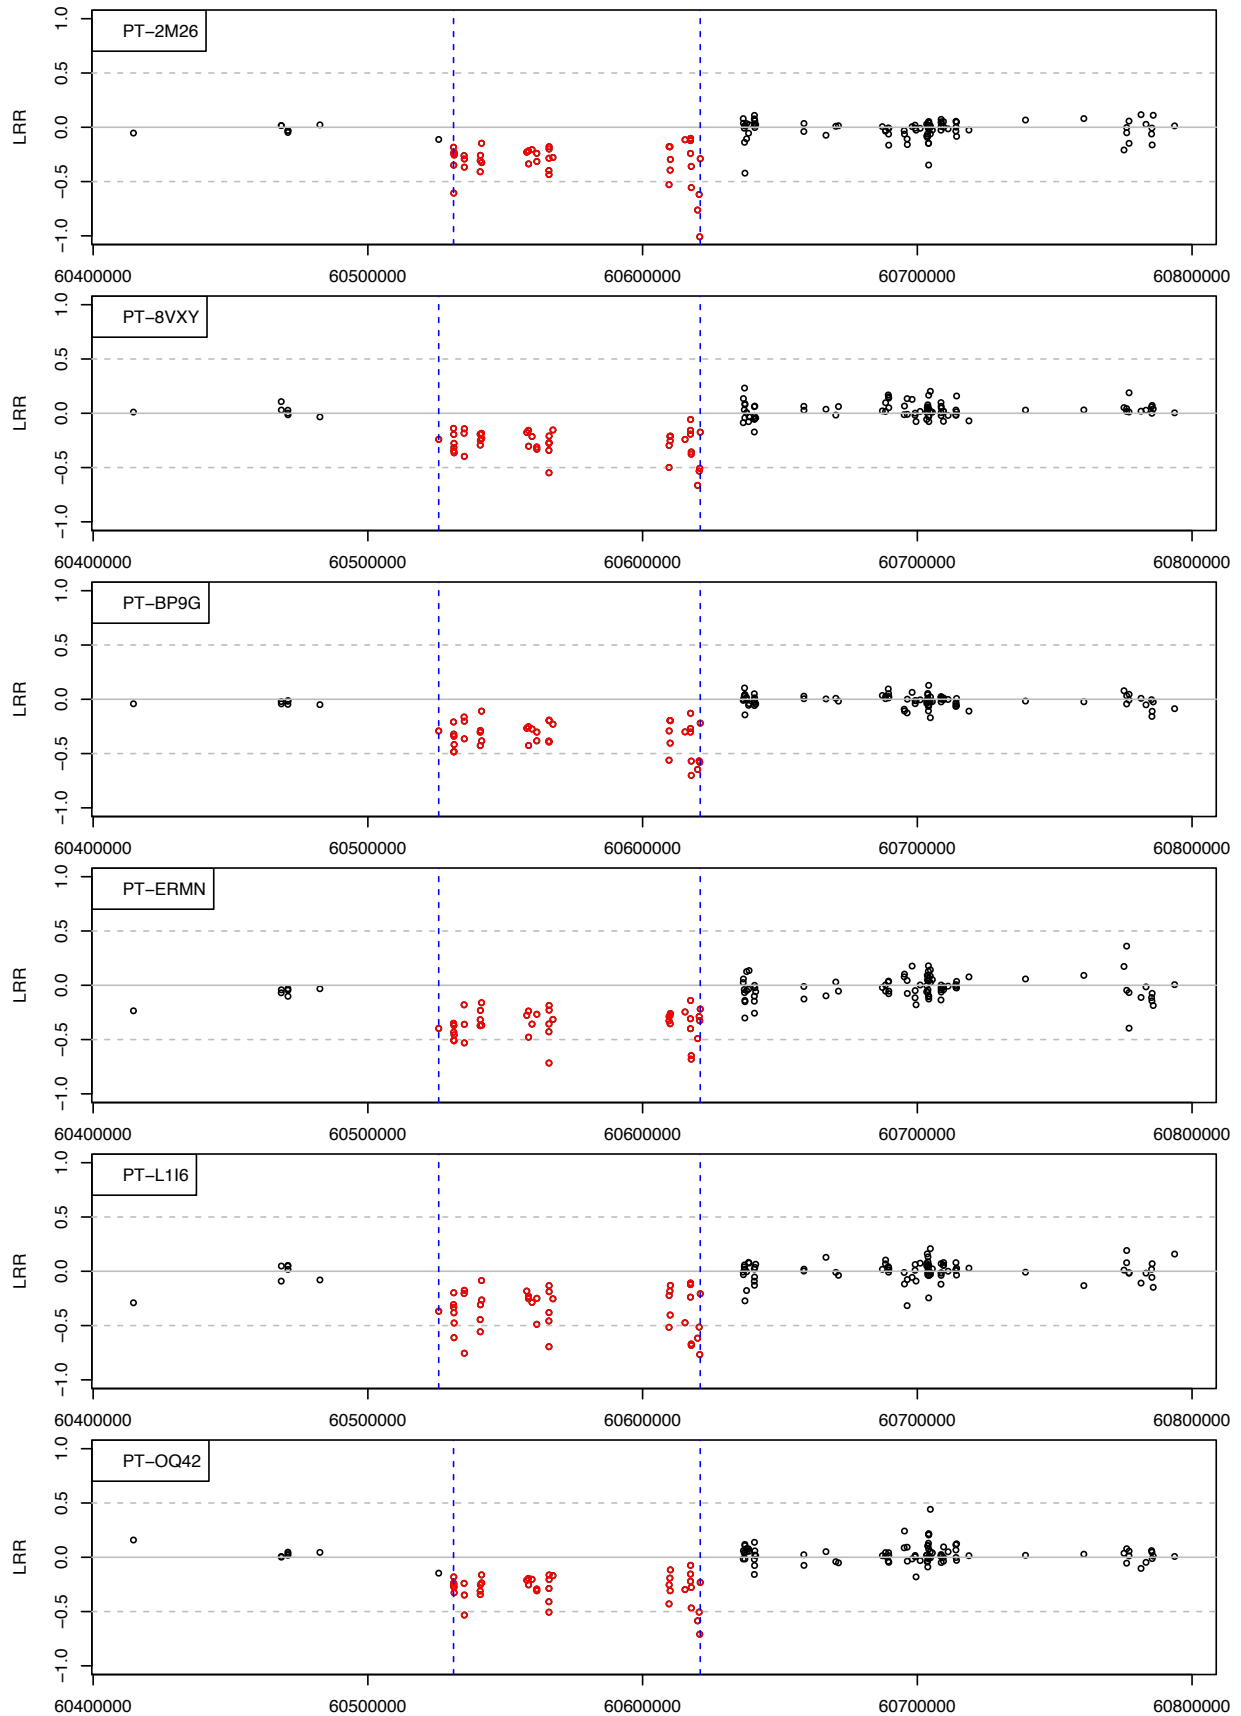

## References

1. Kristjansson E, Allebeck P, Wistedt B. Validity of the diagnosis of schizophrenia in a psychiatric inpatient register. *Nordisk Psykiatrik Tidsskrift* 1987; **41**: 229-234.
2. Dalman C, Broms J, Cullberg J, Allebeck P. Young cases of schizophrenia identified in a national inpatient register--are the diagnoses valid? *Social Psychiatry and Psychiatric Epidemiology* 2002 Nov; **37**(11): 527-531.
3. World Health Organization. *International Classification of Diseases*. 8th revised edn. World Health Organization: Geneva, 1967.
4. World Health Organization. *International Classification of Diseases*. 9th revised edn. World Health Organization: Geneva, 1978.
5. World Health Organization. *International Classification of Diseases*. 10th revised edn. World Health Organization: Geneva, 1992.
6. Hultman CM, Sparen P, Takei N, Murray RM, Cnattingius S. Prenatal and perinatal risk factors for schizophrenia, affective psychosis, and reactive psychosis of early onset: case-control study. *Bmj* 1999 Feb 13; **318**(7181): 421-426.
7. Zammit S, Allebeck P, Dalman C, Lundberg I, Hemmingsson T, Lewis G. Investigating the association between cigarette smoking and schizophrenia in a cohort study. *Am J Psychiatry* 2003 Dec; **160**(12): 2216-2221.
8. Andersson RE, Olaison G, Tysk C, Ekblom A. Appendectomy and protection against ulcerative colitis. *N Engl J Med* 2001 Mar 15; **344**(11): 808-814.
9. Hansson LE, Nyren O, Hsing AW, Bergstrom R, Josefsson S, Chow WH *et al*. The risk of stomach cancer in patients with gastric or duodenal ulcer disease. *N Engl J Med* 1996 Jul 25; **335**(4): 242-249.
10. Schwartz S, Susser E. Genome-wide association studies: does only size matter? *Am J Psychiatry* 2010 Jul; **167**(7): 741-744.
11. Craddock N, Owen MJ. The Kraepelinian dichotomy - going, going... but still not gone. *Br J Psychiatry* 2010 Feb; **196**(2): 92-95.

12. International Schizophrenia Consortium. Common polygenic variation contributes to risk of schizophrenia and bipolar disorder. *Nature* 2009 Jul 1; **460**: 748-752.
13. Lichtenstein P, Yip B, Bjork C, Pawitan Y, Cannon TD, Sullivan PF *et al.* Common genetic influences for schizophrenia and bipolar disorder: A population-based study of 2 million nuclear families. *Lancet* 2009; **373**: 234-239.
14. Goldstein JI, Crenshaw A, Carey J, Grant G, Maguire J, Fromer M *et al.* zCall: a rare variant caller for array-based genotyping. *Bioinformatics* 2012; **28**: 2543-2545.
15. Wang K, Li M, Hadley D, Liu R, Glessner J, Grant SF *et al.* PennCNV: an integrated hidden Markov model designed for high-resolution copy number variation detection in whole-genome SNP genotyping data. *Genome Res* 2007 Nov; **17**(11): 1665-1674.
16. Purcell S, Neale B, Todd-Brown K, Thomas L, Ferreira M, Bender D *et al.* PLINK: a toolset for whole-genome association and population-based linkage analysis. *American Journal of Human Genetics* 2007; **81**: 559-575.
17. Korn JM, Kuruvilla FG, McCarroll SA, Wysoker A, Nemesh J, Cawley S *et al.* Integrated genotype calling and association analysis of SNPs, common copy number polymorphisms and rare CNVs. *Nat Genet* 2008 Oct; **40**(10): 1253-1260.
18. International Schizophrenia Consortium. Rare chromosomal deletions and duplications increase risk of schizophrenia. *Nature* 2008; **455**: 237-241.
